# Supplementary material for: Heronamides with unreported skeletons from deep-sea Streptomyces: discovery and biosynthesis
Source: Royal Society of Chemistry journal article supplement (doi:10.1039/d3qo01837g), 2024-01-01
Supplement: d3qo01837g1.pdf [file d3qo01837g1.pdf]

# **Heronamides with unreported skeletons from a deep-sea *Streptomyces*: discovery and biosynthesis**

Yi Zhao,<sup>‡a</sup> Hu Chen,<sup>‡a</sup> Lianguang Yue,<sup>a</sup> Yun Dong,<sup>a</sup> Di Su,<sup>a</sup> Jingyi Lyu,<sup>a</sup> Wenli Li<sup>a,b</sup>  
and Huayue Li<sup>\*a,b</sup>

<sup>a</sup> Key Laboratory of Marine Drugs, Ministry of Education, School of Medicine and  
Pharmacy, Ocean University of China, Qingdao 266003, China

<sup>b</sup> Laboratory for Marine Drugs and Bioproducts of Qingdao National Laboratory for  
Marine Science and Technology, Qingdao 266237, China

## Contents

|                                                                                                                        |    |
|------------------------------------------------------------------------------------------------------------------------|----|
| <b>Figure S1.</b> Neighbor-joining phylogenetic tree based on the 16S rRNA gene sequence of the OUCT16-38 strain ..... | 4  |
| <b>Figure S2.</b> UV spectrum of <b>1–9</b> .....                                                                      | 5  |
| <b>Figure S3.</b> HPLC analysis of Fr.6~Fr.8.....                                                                      | 6  |
| <b>Figure S4.</b> HRESIMS spectrum of <b>1</b> .....                                                                   | 7  |
| <b>Figure S5.</b> IR spectrum of <b>1</b> .....                                                                        | 7  |
| <b>Figure S6.</b> <sup>1</sup> H NMR spectrum of <b>1</b> in CD <sub>3</sub> OD (600 MHz).....                         | 8  |
| <b>Figure S7.</b> DEPTQ spectrum of <b>1</b> in CD <sub>3</sub> OD (150 MHz) .....                                     | 8  |
| <b>Figure S8.</b> HSQC spectrum of <b>1</b> in CD <sub>3</sub> OD (600 MHz).....                                       | 9  |
| <b>Figure S9.</b> COSY spectrum of <b>1</b> in CD <sub>3</sub> OD (600 MHz).....                                       | 9  |
| <b>Figure S10.</b> HMBC spectrum of <b>1</b> in CD <sub>3</sub> OD (600 MHz).....                                      | 10 |
| <b>Figure S11.</b> NOESY spectrum of <b>1</b> in CD <sub>3</sub> OD (600 MHz) .....                                    | 10 |
| <b>Figure S12.</b> HRESIMS spectrum of <b>2</b> .....                                                                  | 11 |
| <b>Figure S13.</b> IR spectrum of <b>2</b> .....                                                                       | 11 |
| <b>Figure S14.</b> <sup>1</sup> H NMR spectrum of <b>2</b> in CD <sub>3</sub> OD (600 MHz).....                        | 12 |
| <b>Figure S15.</b> DEPTQ spectrum of <b>2</b> in CD <sub>3</sub> OD (150 MHz) .....                                    | 12 |
| <b>Figure S16.</b> HSQC spectrum of <b>2</b> in CD <sub>3</sub> OD (600 MHz).....                                      | 13 |
| <b>Figure S17.</b> COSY spectrum of <b>2</b> in CD <sub>3</sub> OD (600 MHz).....                                      | 13 |
| <b>Figure S18.</b> HMBC spectrum of <b>2</b> in CD <sub>3</sub> OD (600 MHz).....                                      | 14 |
| <b>Figure S19.</b> NOESY spectrum of <b>2</b> in CD <sub>3</sub> OD (600 MHz) .....                                    | 14 |
| <b>Figure S20.</b> HRESIMS spectrum of <b>3</b> .....                                                                  | 15 |
| <b>Figure S21.</b> IR spectrum of <b>3</b> .....                                                                       | 15 |
| <b>Figure S22.</b> <sup>1</sup> H NMR spectrum of <b>3</b> in CD <sub>3</sub> OD (600 MHz).....                        | 16 |
| <b>Figure S23.</b> DEPTQ spectrum of <b>3</b> in CD <sub>3</sub> OD (150 MHz) .....                                    | 16 |
| <b>Figure S24.</b> HSQC spectrum of <b>3</b> in CD <sub>3</sub> OD (600 MHz).....                                      | 17 |
| <b>Figure S25.</b> COSY spectrum of <b>3</b> in CD <sub>3</sub> OD (600 MHz).....                                      | 17 |
| <b>Figure S26.</b> HMBC spectrum of <b>3</b> in CD <sub>3</sub> OD (600 MHz).....                                      | 18 |
| <b>Figure S27.</b> NOESY spectrum of <b>3</b> in CD <sub>3</sub> OD (600 MHz) .....                                    | 18 |
| <b>Figure S28.</b> HRESIMS spectrum of <b>4</b> .....                                                                  | 19 |
| <b>Figure S29.</b> IR spectrum of <b>4</b> .....                                                                       | 19 |
| <b>Figure S30.</b> <sup>1</sup> H NMR spectrum of <b>4</b> in CD <sub>3</sub> OD (600 MHz).....                        | 20 |

|                                                                                                                                                 |           |
|-------------------------------------------------------------------------------------------------------------------------------------------------|-----------|
| <b>Figure S31.</b> DEPTQ spectrum of <b>4</b> in CD <sub>3</sub> OD (150 MHz) .....                                                             | <b>20</b> |
| <b>Figure S32.</b> HSQC spectrum of <b>4</b> in CD <sub>3</sub> OD (600 MHz).....                                                               | <b>21</b> |
| <b>Figure S33.</b> COSY spectrum of <b>4</b> in CD <sub>3</sub> OD (600 MHz).....                                                               | <b>21</b> |
| <b>Figure S34.</b> HMBC spectrum of <b>4</b> in CD <sub>3</sub> OD (600 MHz).....                                                               | <b>22</b> |
| <b>Figure S35.</b> NOESY spectrum of <b>4</b> in CD <sub>3</sub> OD (600 MHz) .....                                                             | <b>22</b> |
| <b>Figure S36.</b> HRESIMS spectrum of <b>5</b> .....                                                                                           | <b>23</b> |
| <b>Figure S37.</b> IR spectrum of <b>5</b> .....                                                                                                | <b>23</b> |
| <b>Figure S38.</b> <sup>1</sup> H NMR spectrum of <b>5</b> in CD <sub>3</sub> OD (600 MHz).....                                                 | <b>24</b> |
| <b>Figure S39.</b> DEPTQ spectrum of <b>5</b> in CD <sub>3</sub> OD (150 MHz) .....                                                             | <b>24</b> |
| <b>Figure S40.</b> HSQC spectrum of <b>5</b> in CD <sub>3</sub> OD (600 MHz).....                                                               | <b>25</b> |
| <b>Figure S41.</b> COSY spectrum of <b>5</b> in CD <sub>3</sub> OD (600 MHz).....                                                               | <b>25</b> |
| <b>Figure S42.</b> HMBC spectrum of <b>5</b> in CD <sub>3</sub> OD (600 MHz).....                                                               | <b>26</b> |
| <b>Figure S43.</b> NOESY spectrum of <b>5</b> in CD <sub>3</sub> OD (600 MHz) .....                                                             | <b>26</b> |
| <b>Figure S44.</b> HRESIMS spectrum of <b>6</b> .....                                                                                           | <b>27</b> |
| <b>Figure S45.</b> <sup>1</sup> H NMR spectrum of <b>6</b> in CD <sub>3</sub> OD (600 MHz).....                                                 | <b>27</b> |
| <b>Figure S46.</b> DEPTQ spectrum of <b>6</b> in CD <sub>3</sub> OD (150 MHz) .....                                                             | <b>28</b> |
| <b>Figure S47.</b> HRESIMS spectrum of <b>7</b> .....                                                                                           | <b>28</b> |
| <b>Figure S48.</b> <sup>1</sup> H NMR spectrum of <b>7</b> in CD <sub>3</sub> OD (600 MHz).....                                                 | <b>29</b> |
| <b>Figure S49.</b> DEPTQ spectrum of <b>7</b> in CD <sub>3</sub> OD (150 MHz) .....                                                             | <b>29</b> |
| <b>Figure S50.</b> HRESIMS spectrum of <b>8</b> .....                                                                                           | <b>30</b> |
| <b>Figure S51.</b> <sup>1</sup> H NMR spectrum of <b>8</b> in pyridine- <i>d</i> <sub>5</sub> (500 MHz).....                                    | <b>30</b> |
| <b>Figure S52.</b> HRESIMS spectrum of <b>9</b> .....                                                                                           | <b>31</b> |
| <b>Figure S53.</b> <sup>1</sup> H NMR spectrum of <b>9</b> in pyridine- <i>d</i> <sub>5</sub> (500 MHz).....                                    | <b>31</b> |
| <b>Figure S54.</b> Proposed biosynthetic pathway of compound <b>9</b> by <i>hrm</i> gene cluster in <i>Streptomyces</i> sp. OUCT16-38.....      | <b>32</b> |
| <b>Figure S55.</b> HPLC trace of compounds <b>8</b> and <b>9</b> retained in MeOH, ACN and EtOAc at room temperature for up to 120 h .....      | <b>33</b> |
| <b>Table S1.</b> Antibacterial activity of the EtOAc extract of the OUCT16-38 strain .....                                                      | <b>34</b> |
| <b>Table S2.</b> Functional prediction of proteins encoded by genes in <i>hrm</i> gene cluster and their homologs in known heronamide BGCs..... | <b>34</b> |
| <b>Table S3.</b> Antibacterial Activity of <b>1–9</b> (MIC, μg/mL) .....                                                                        | <b>37</b> |
| <b>Table S4.</b> Cytotoxicity of <b>8</b> and <b>9</b> (IC <sub>50</sub> , μM) .....                                                            | <b>37</b> |

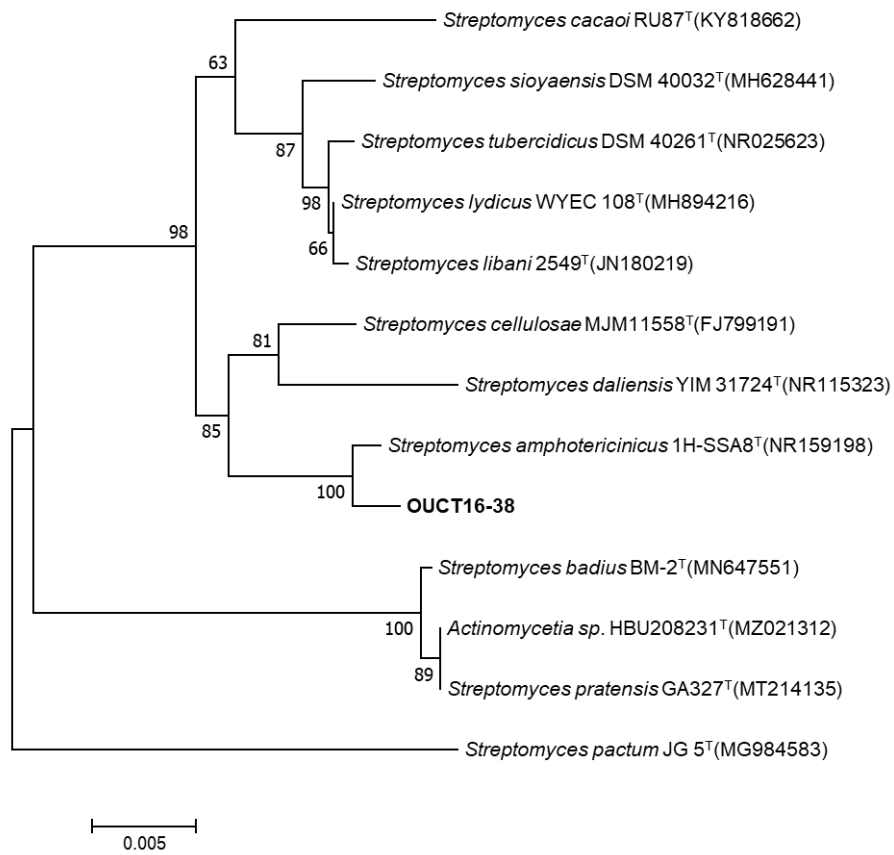

**Figure S1.** Neighbor-joining phylogenetic tree based on the 16S rRNA gene sequence of the OUCT16-38 strain

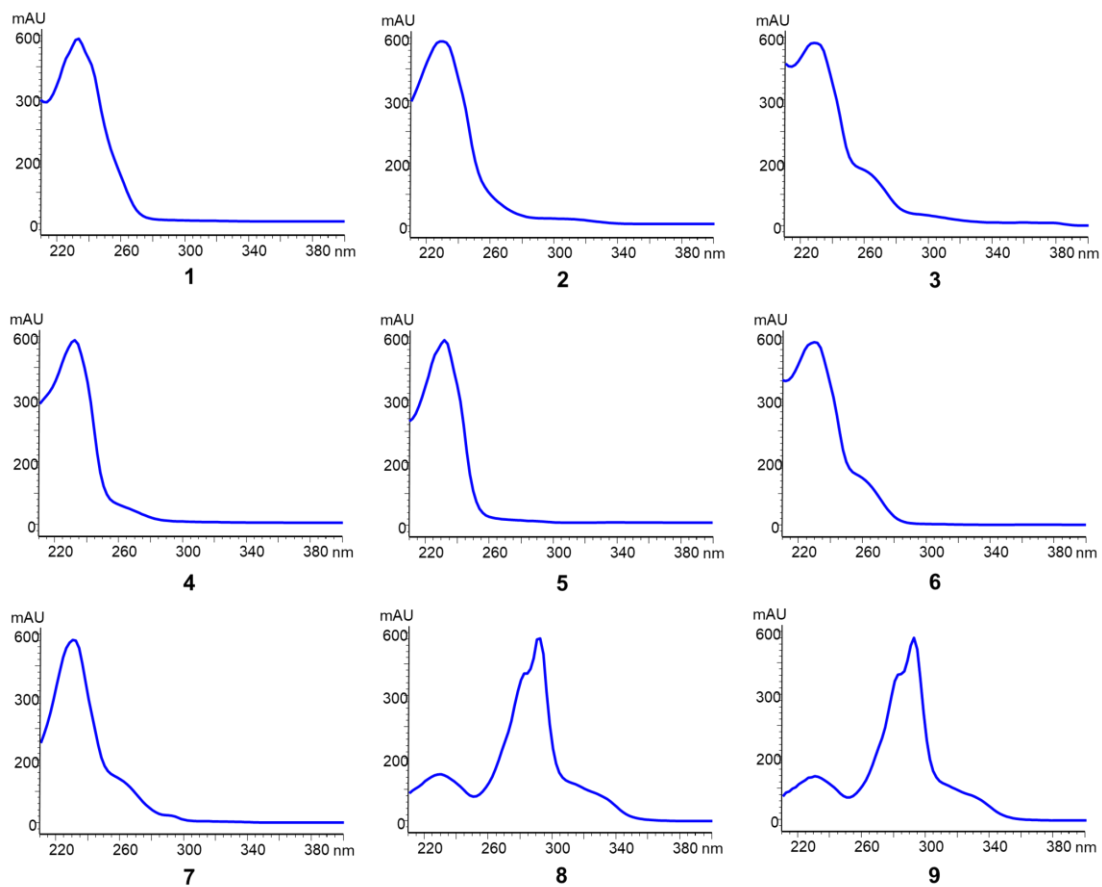

**Figure S2. UV spectra of 1–9**

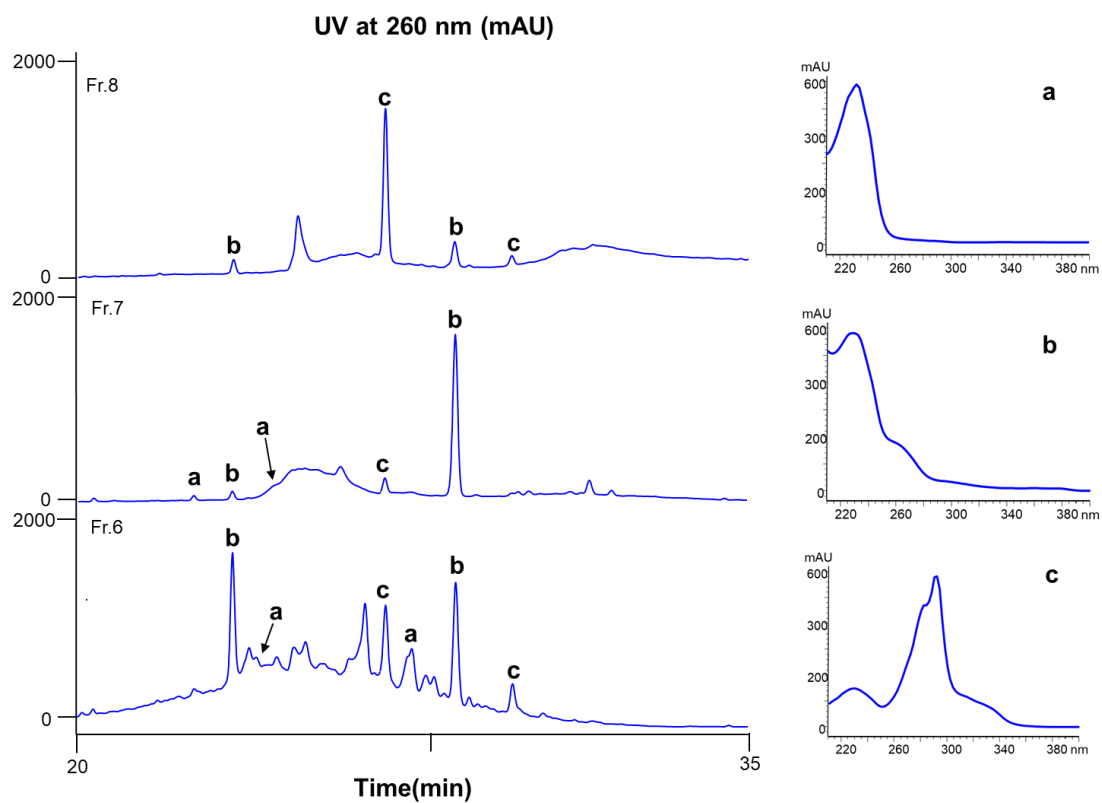

**Figure S3.** HPLC analysis of Fr.6~Fr.8. Peaks displaying heronamide-type UV spectra were labeled.

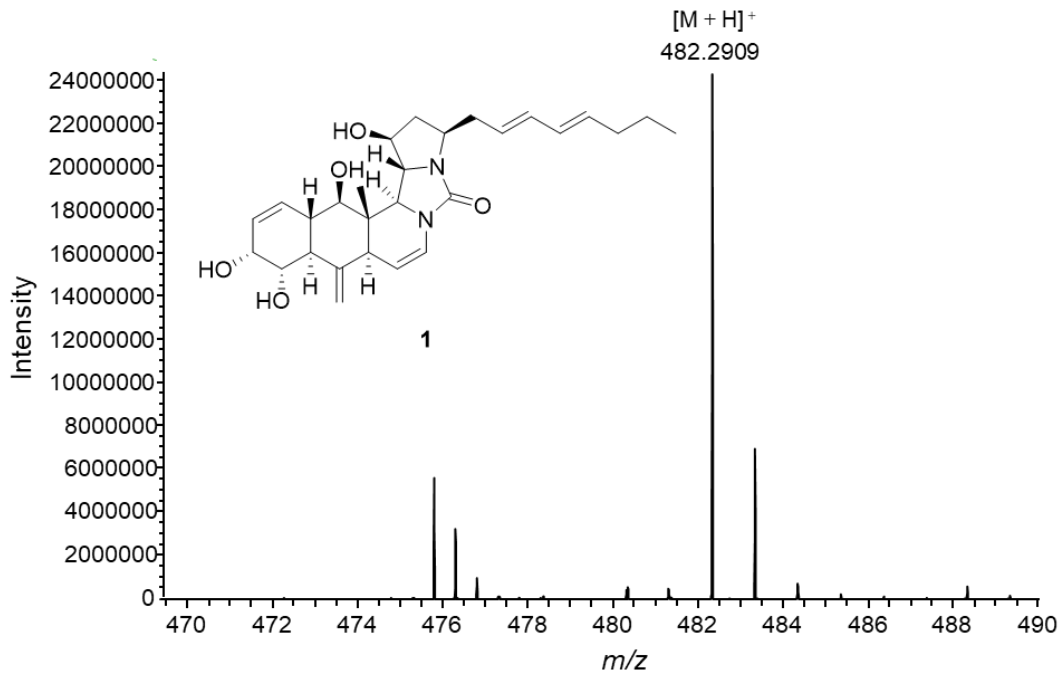

Figure S4. HRESIMS spectrum of 1

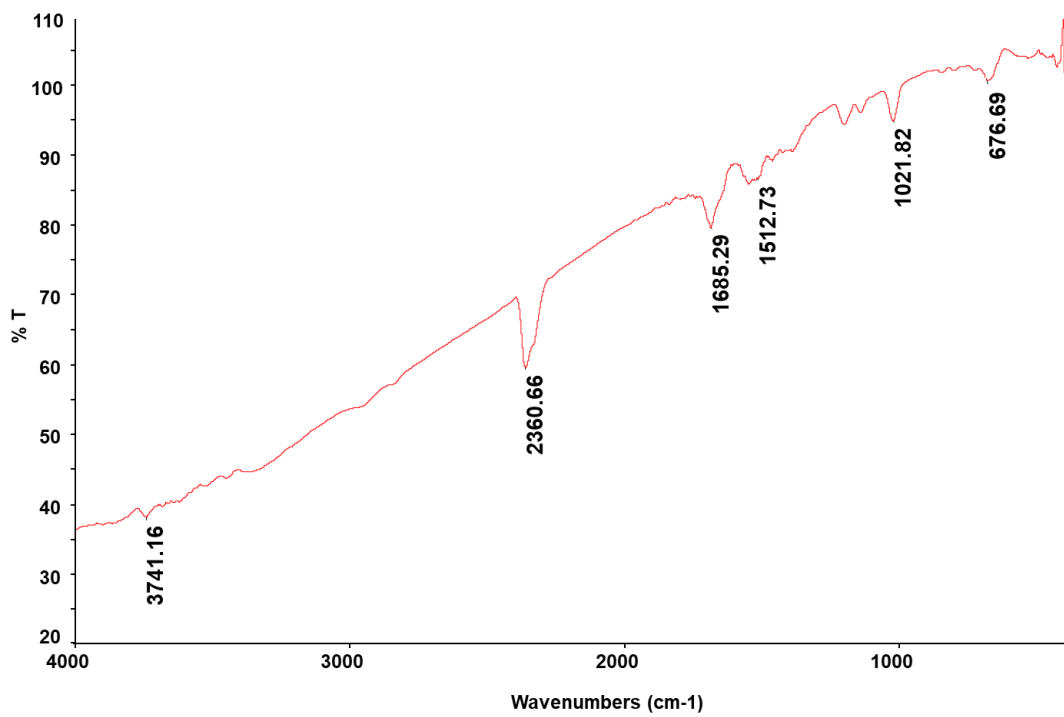

Figure S5. IR spectrum of 1

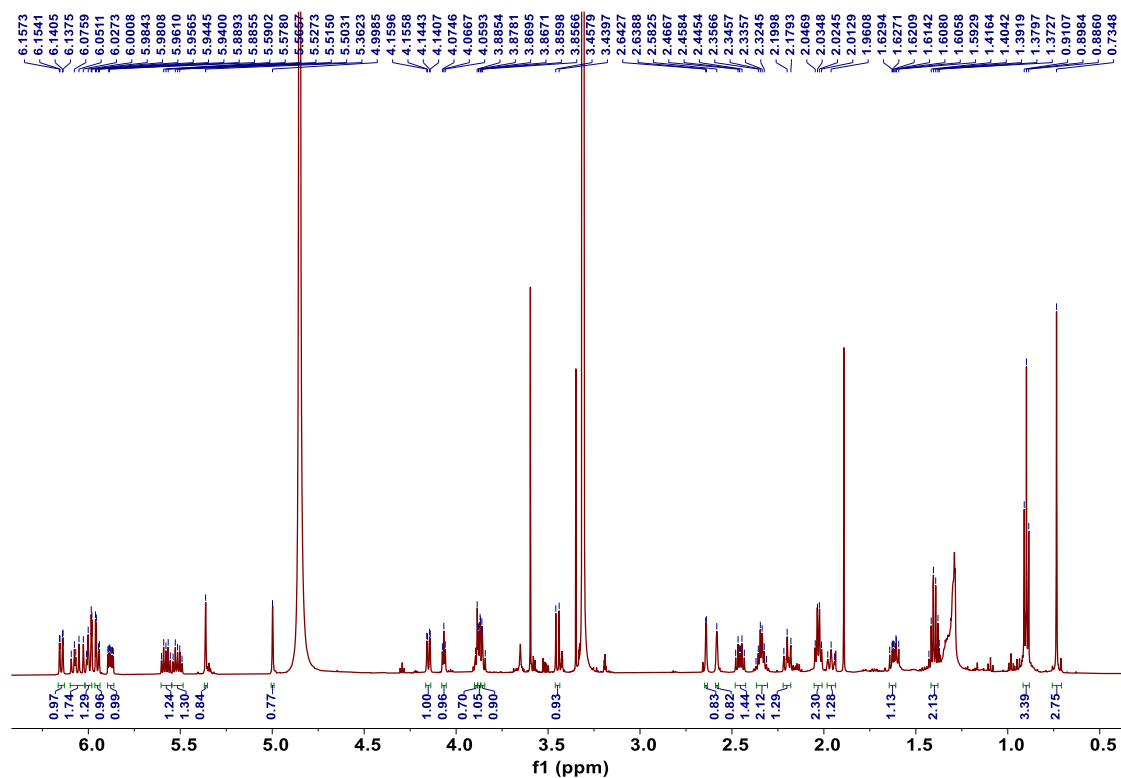

Figure S6.  $^1\text{H}$  NMR spectrum of **1** in  $\text{CD}_3\text{OD}$  (600 MHz)

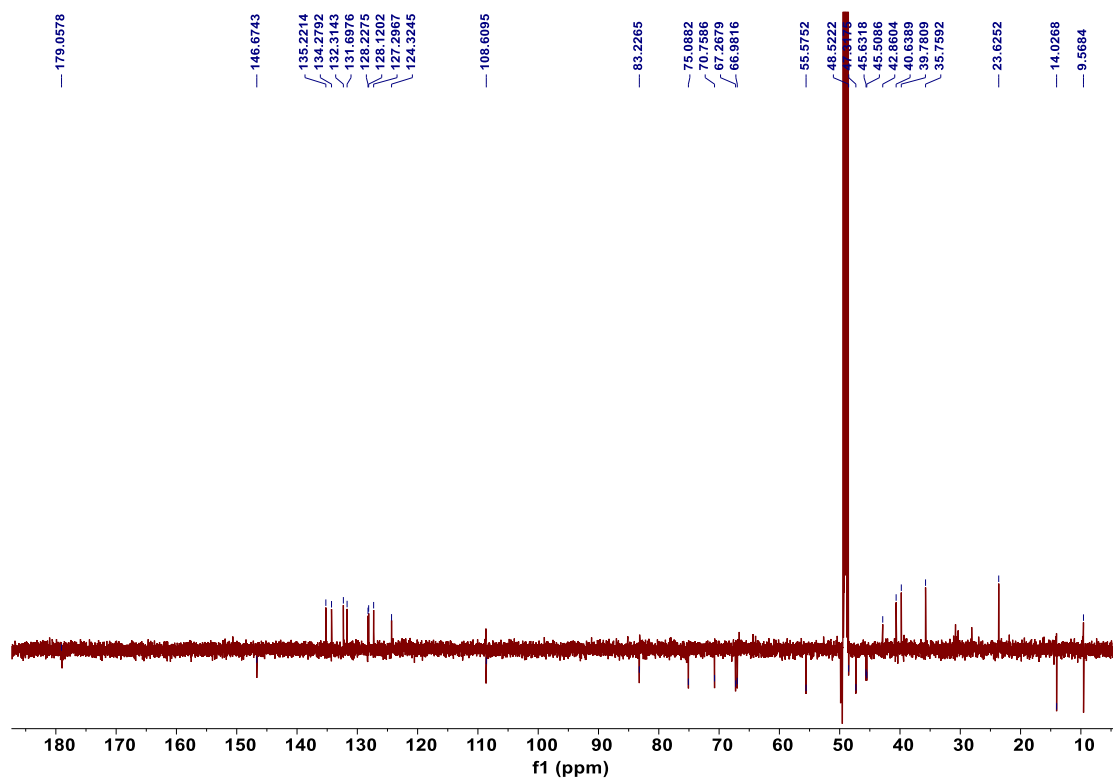

Figure S7. DEPTQ spectrum of **1** in  $\text{CD}_3\text{OD}$  (150 MHz)



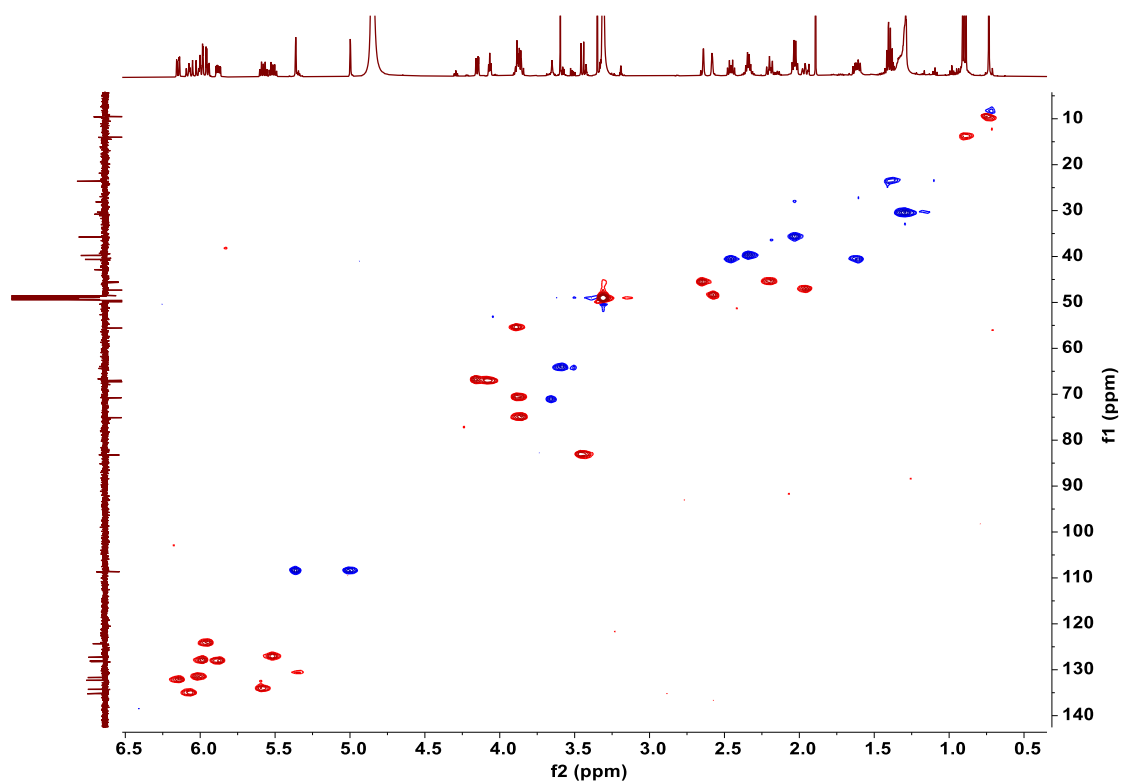

Figure S8. HSQC spectrum of **1** in CD<sub>3</sub>OD (600 MHz)

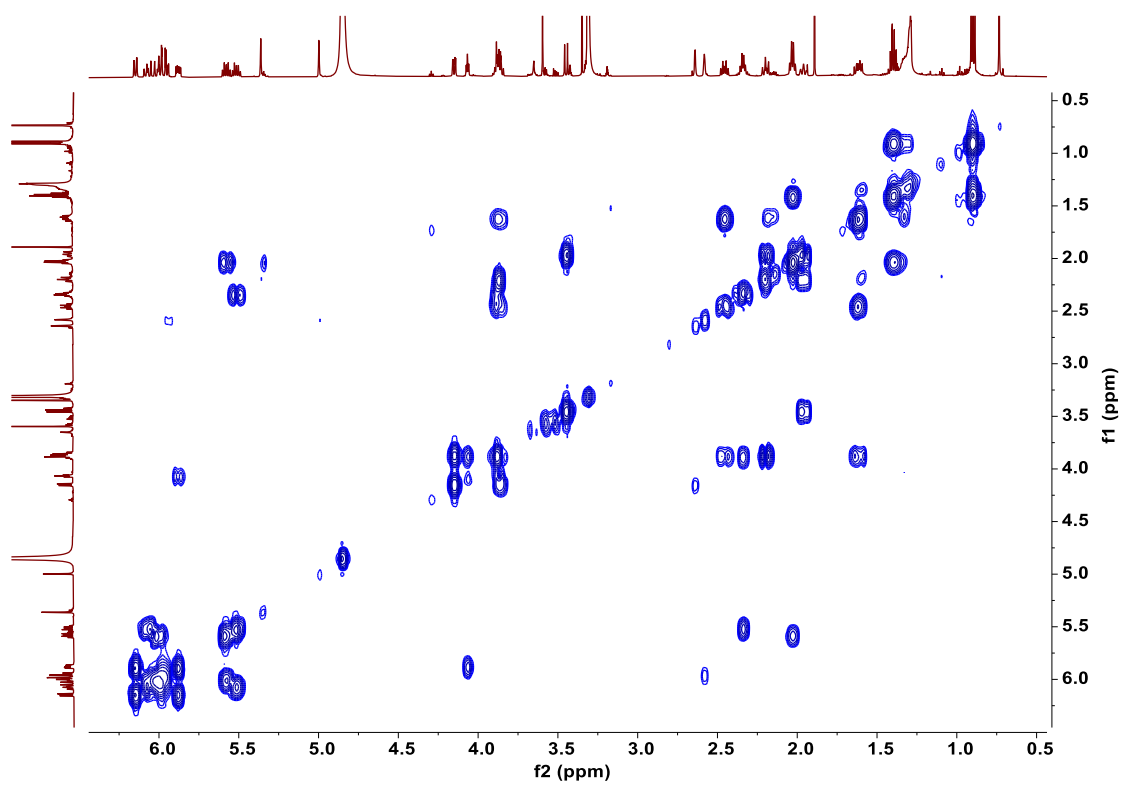

Figure S9. COSY spectrum of **1** in CD<sub>3</sub>OD (600 MHz)

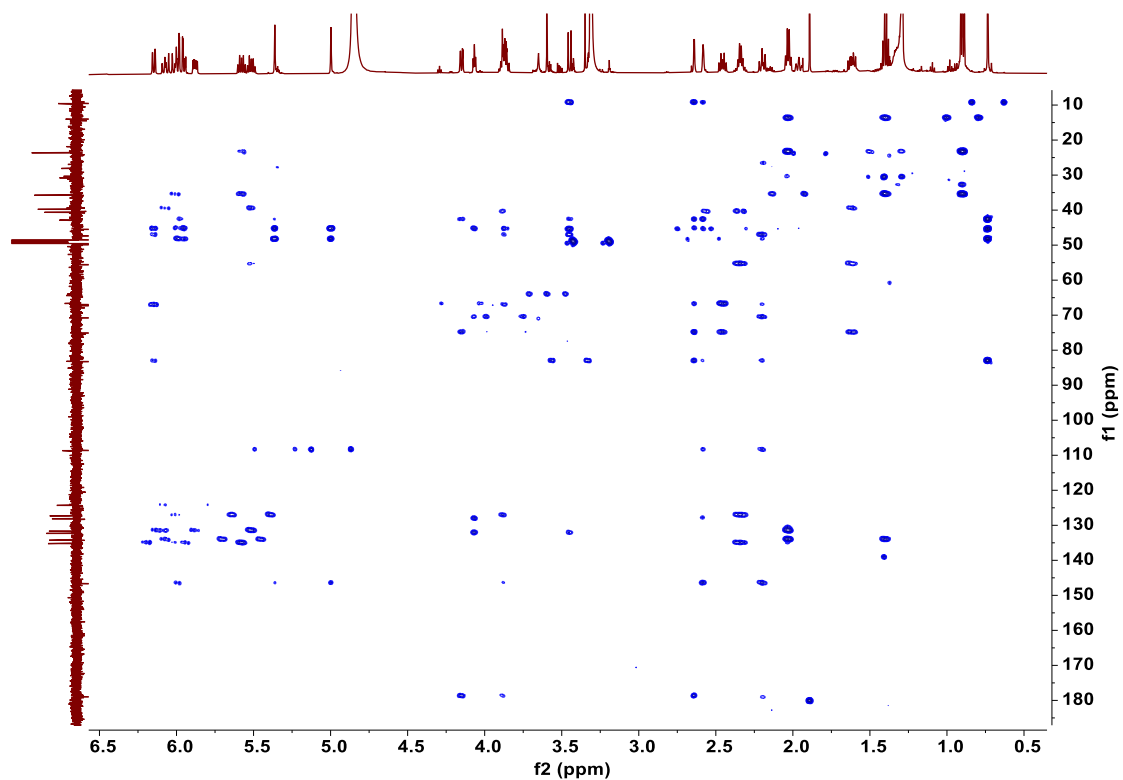

Figure S10. HMBC spectrum of **1** in CD<sub>3</sub>OD (600 MHz)

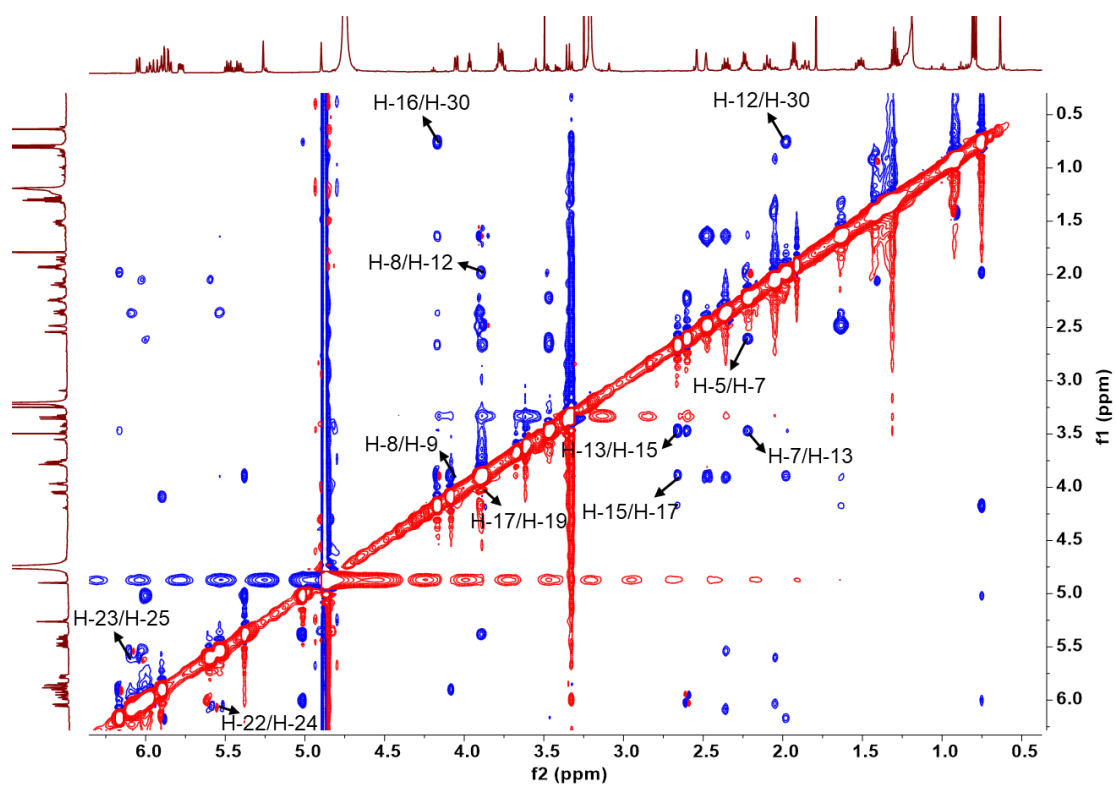

Figure S11. NOESY spectrum of **1** in CD<sub>3</sub>OD (600 MHz)

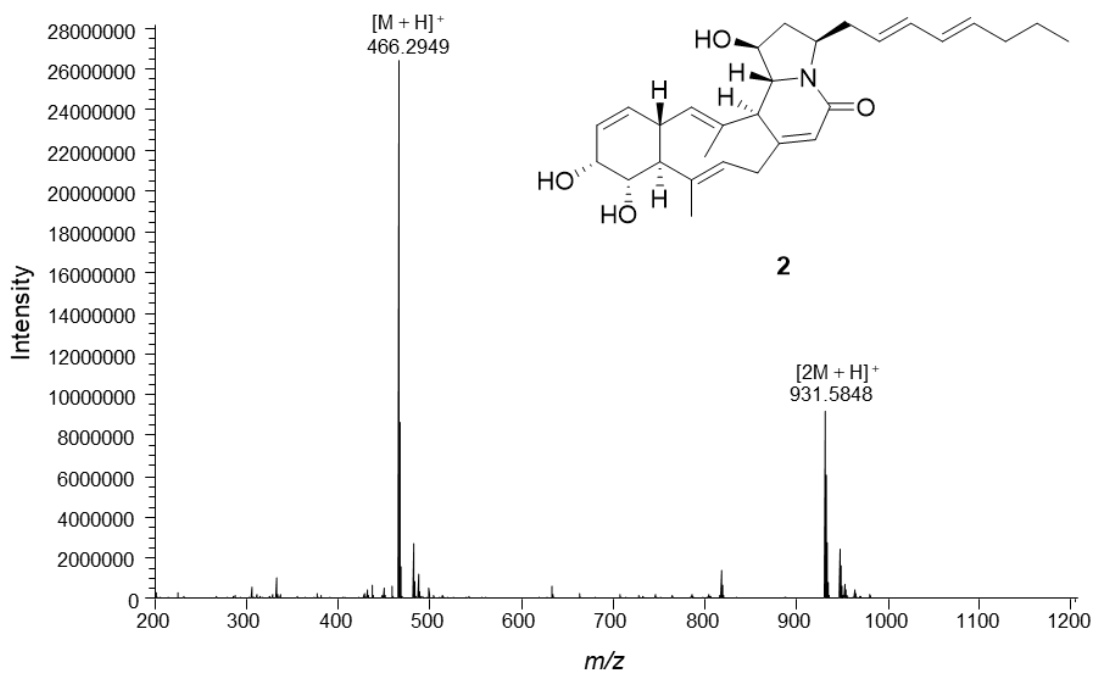

Figure S12. HRESIMS spectrum of 2

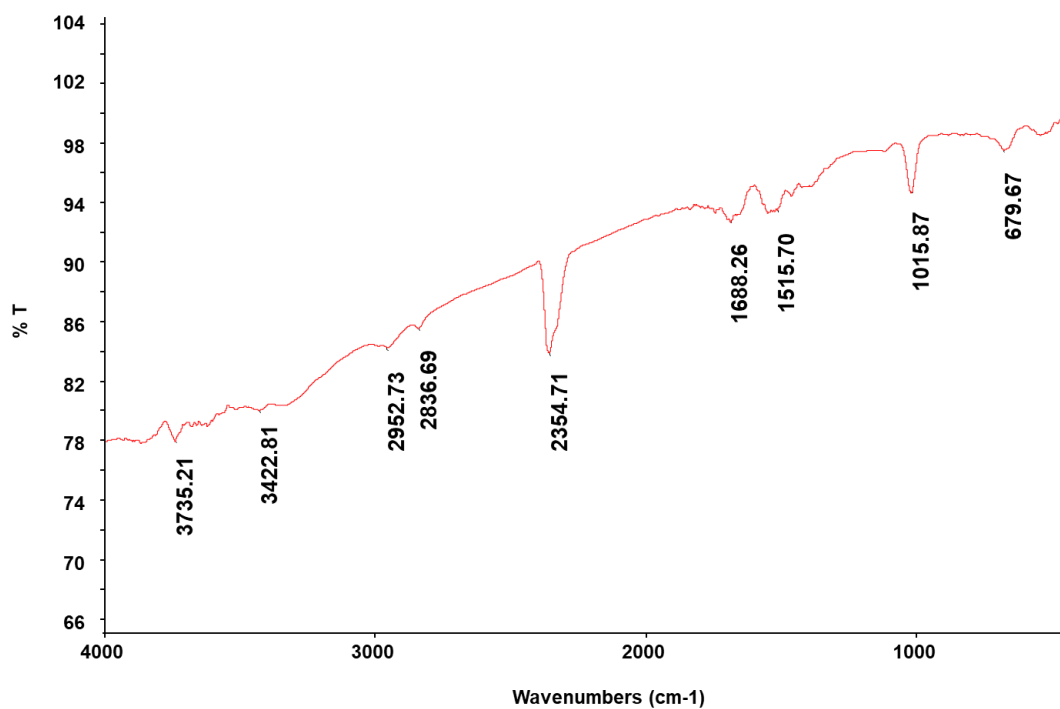

Figure S13. IR spectrum of 2

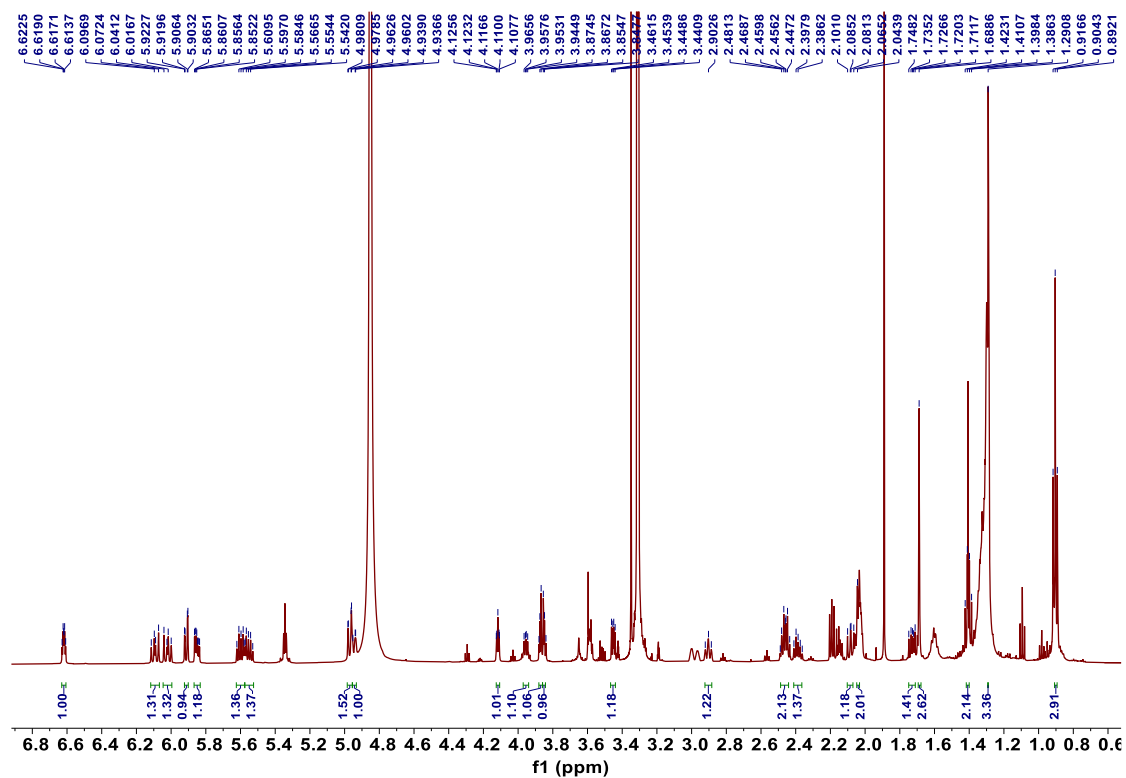

Figure S14.  $^1\text{H}$  NMR spectrum of **2** in  $\text{CD}_3\text{OD}$  (600 MHz)

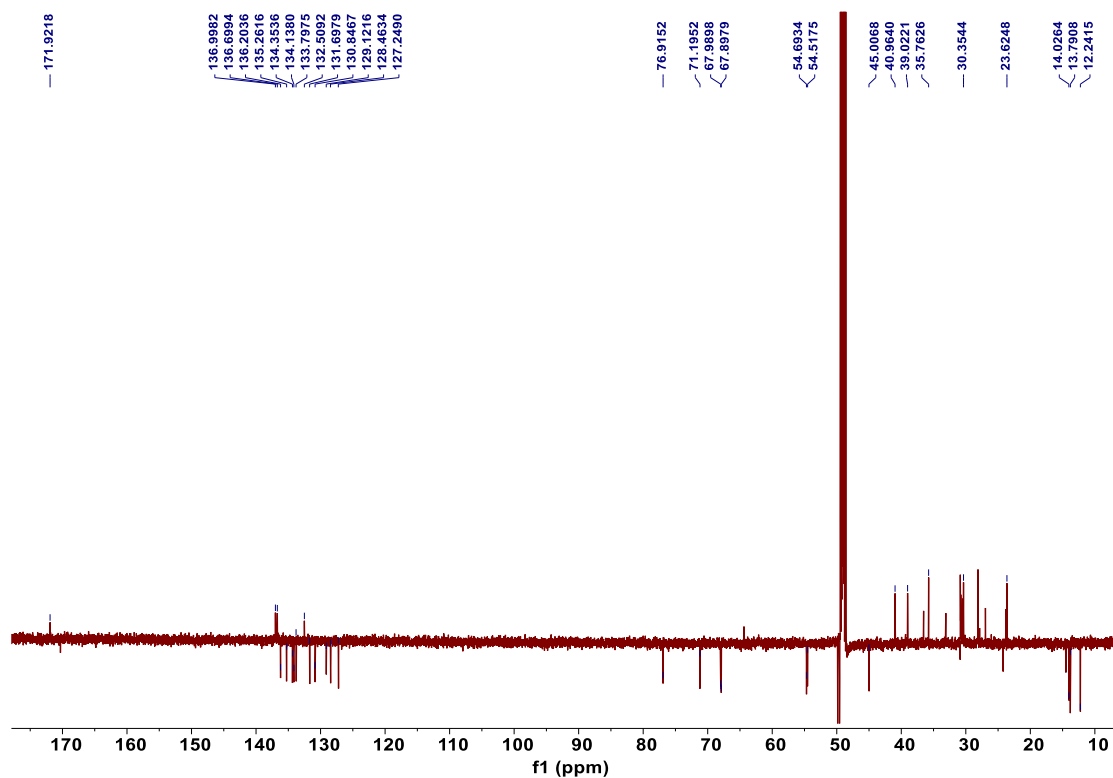

Figure S15. DEPTQ spectrum of **2** in  $\text{CD}_3\text{OD}$  (150 MHz)

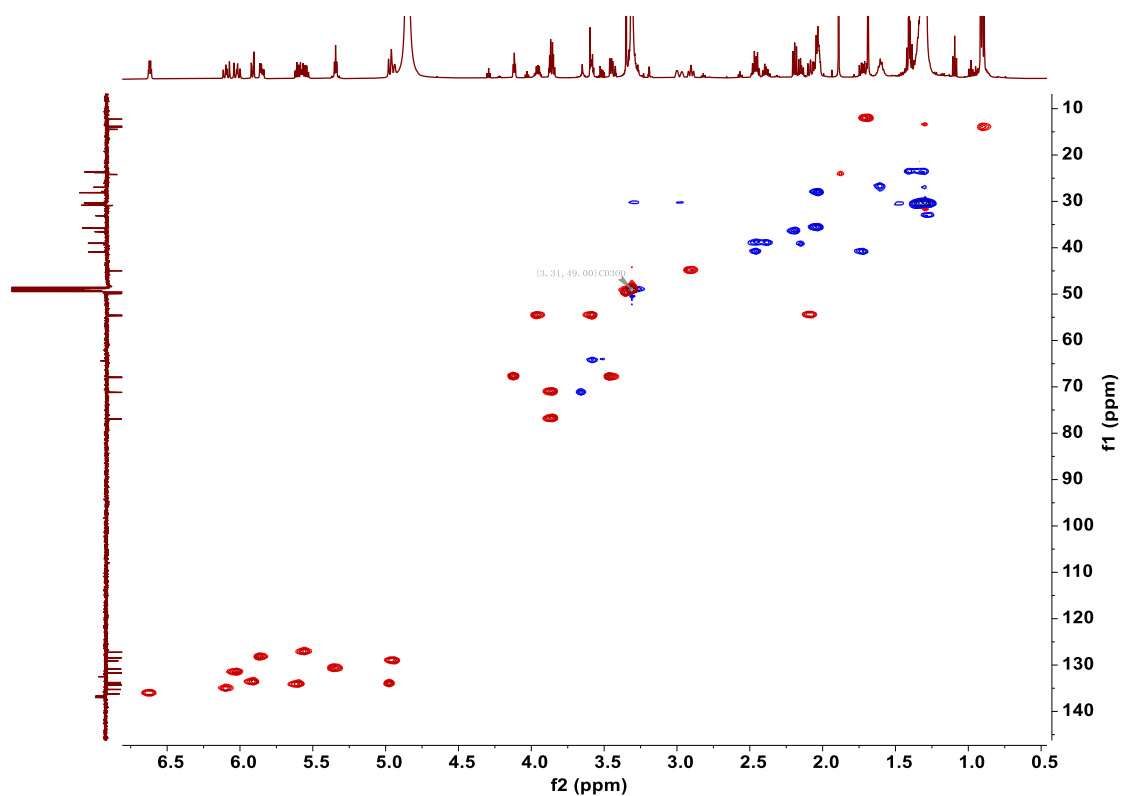

**Figure S16.** HSQC spectrum of **2** in CD<sub>3</sub>OD (600 MHz)

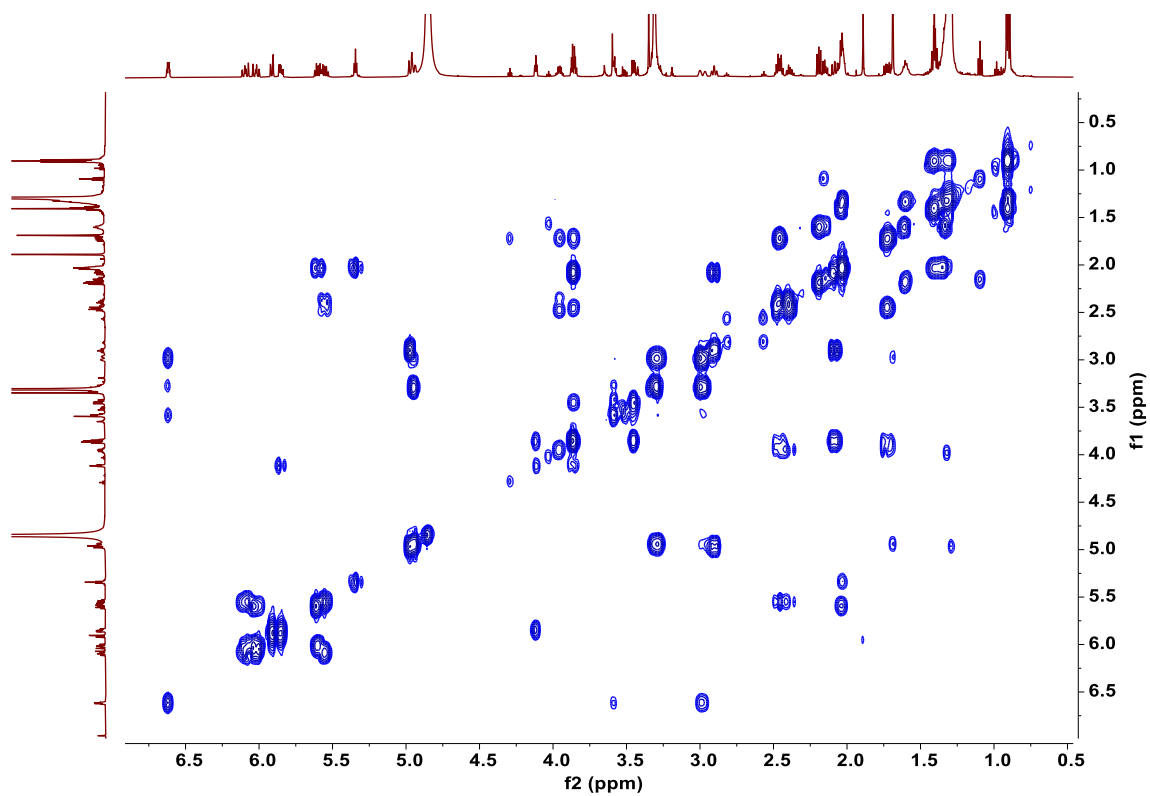

**Figure S17.** COSY spectrum of **2** in CD<sub>3</sub>OD (600 MHz)

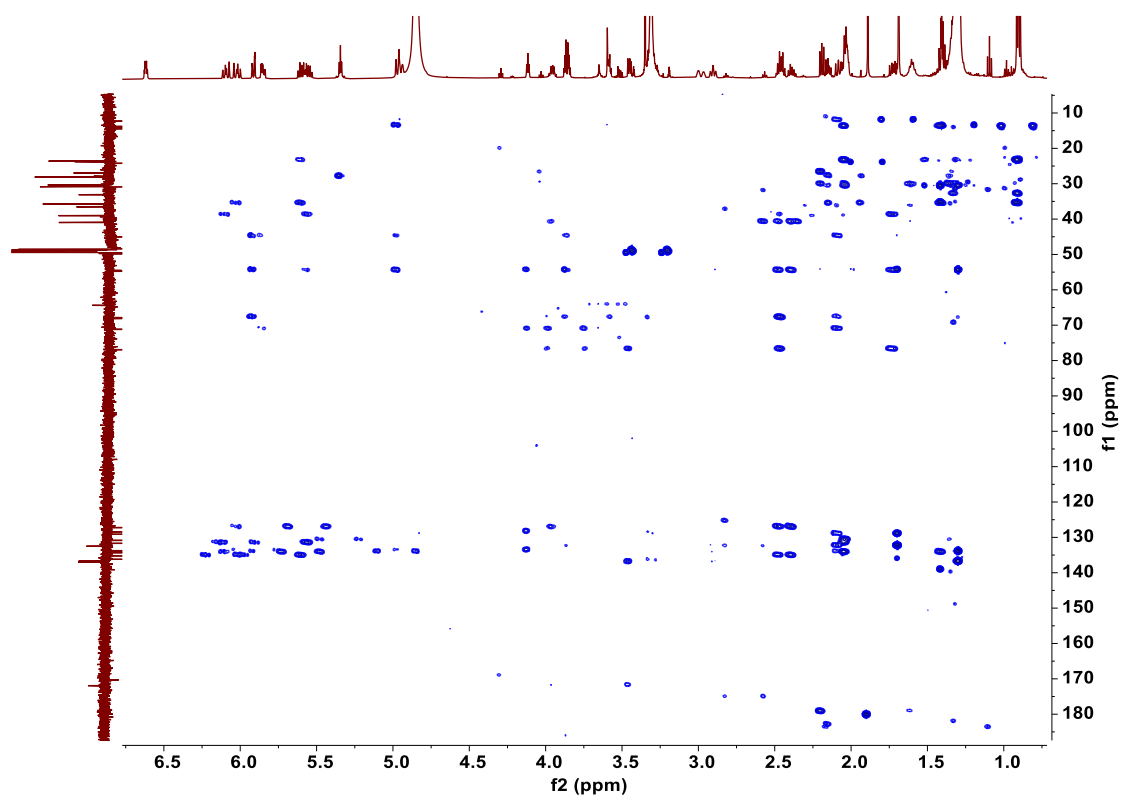

Figure S18. HMBC spectrum of **2** in CD<sub>3</sub>OD (600 MHz)

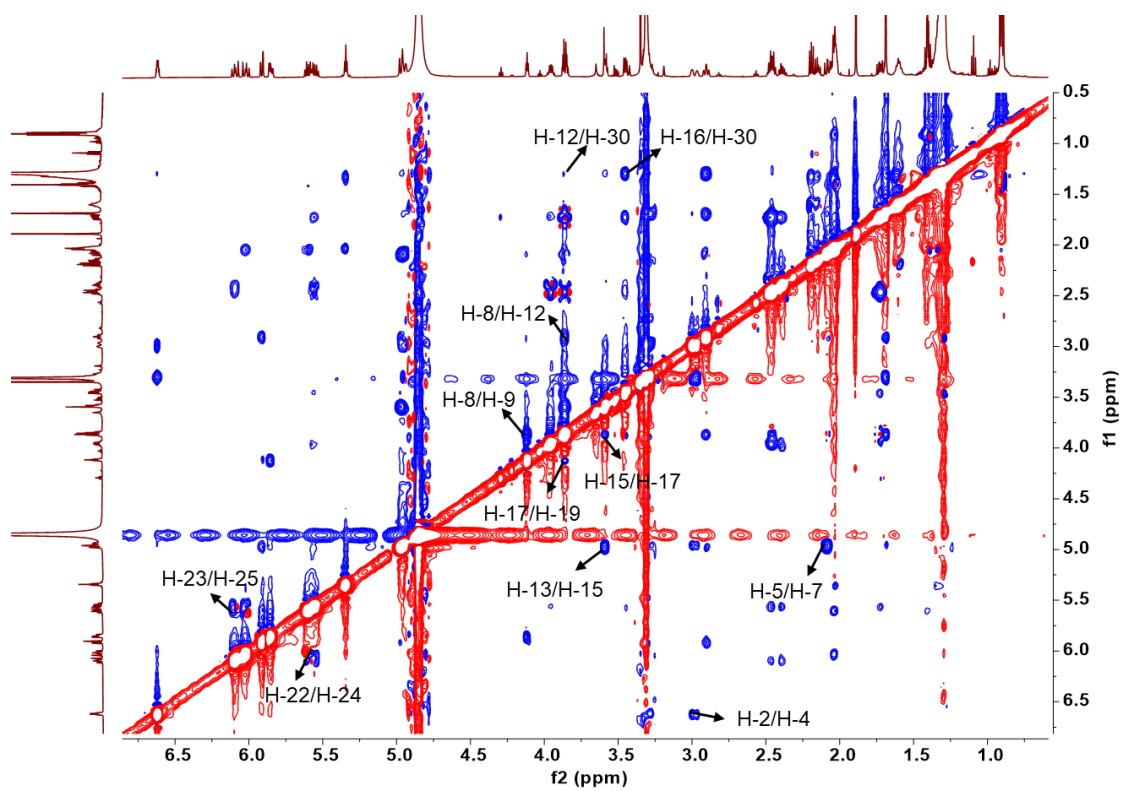

Figure S19. NOESY spectrum of **2** in CD<sub>3</sub>OD (600 MHz)

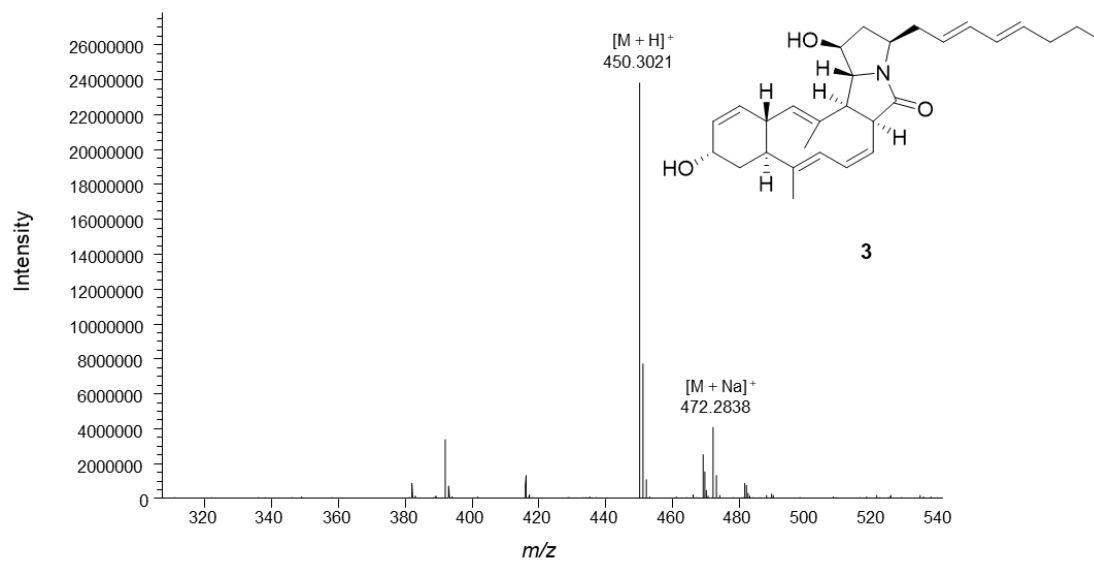

**Figure S20.** HRESIMS spectrum of **3**

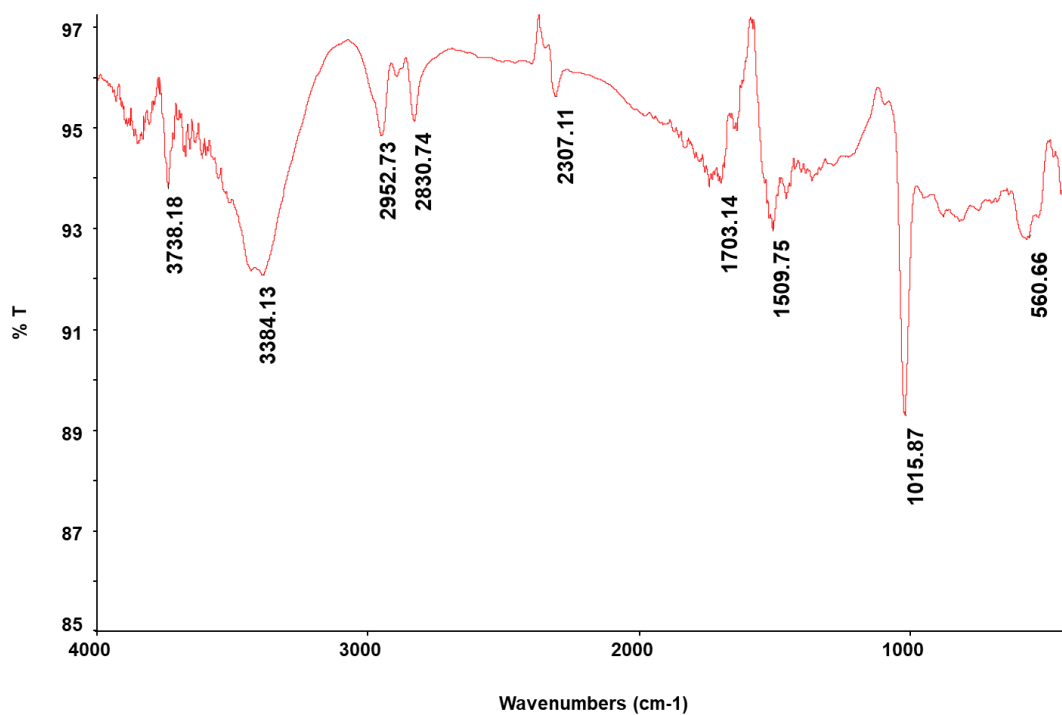

**Figure S21.** IR spectrum of **3**

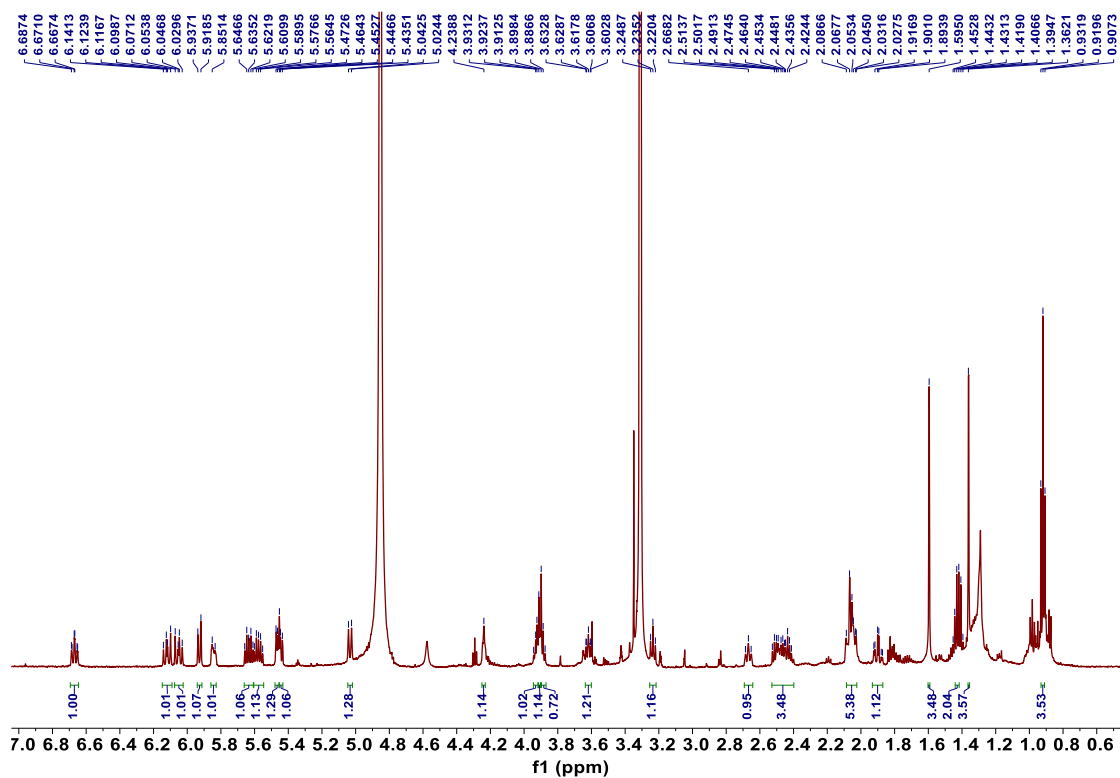

Figure S22.  $^1\text{H}$  NMR spectrum of **3** in  $\text{CD}_3\text{OD}$  (600 MHz)

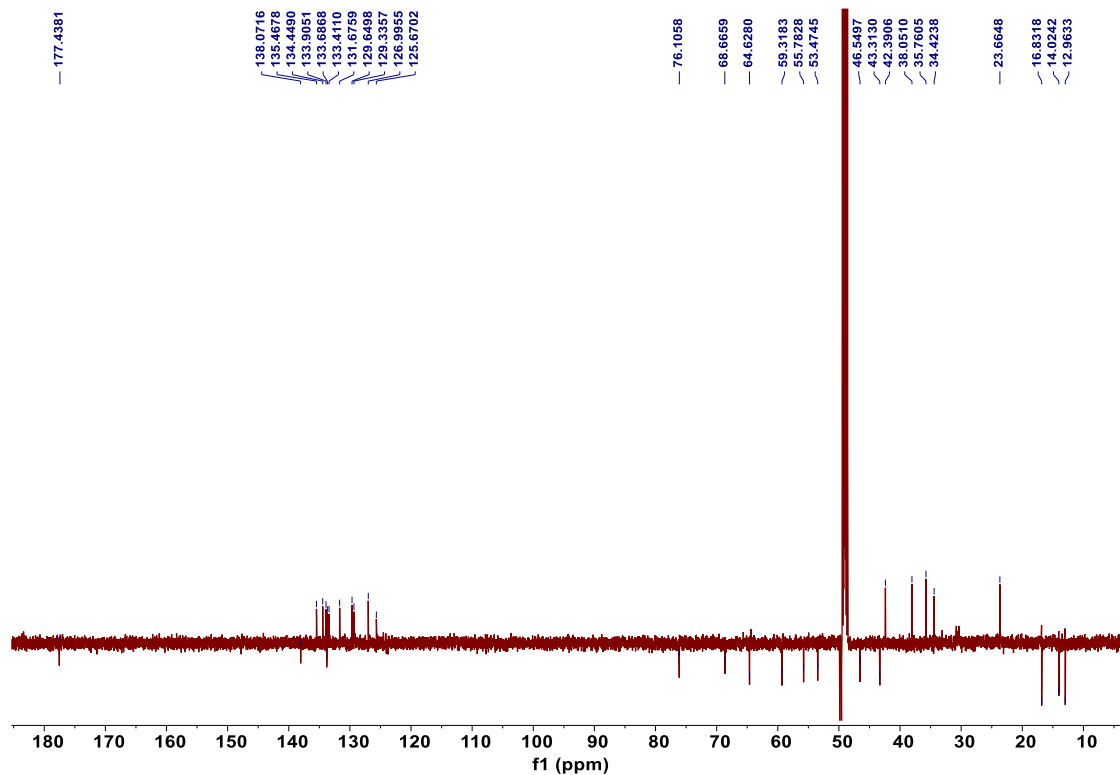

Figure S23. DEPTQ spectrum of **3** in  $\text{CD}_3\text{OD}$  (150 MHz)



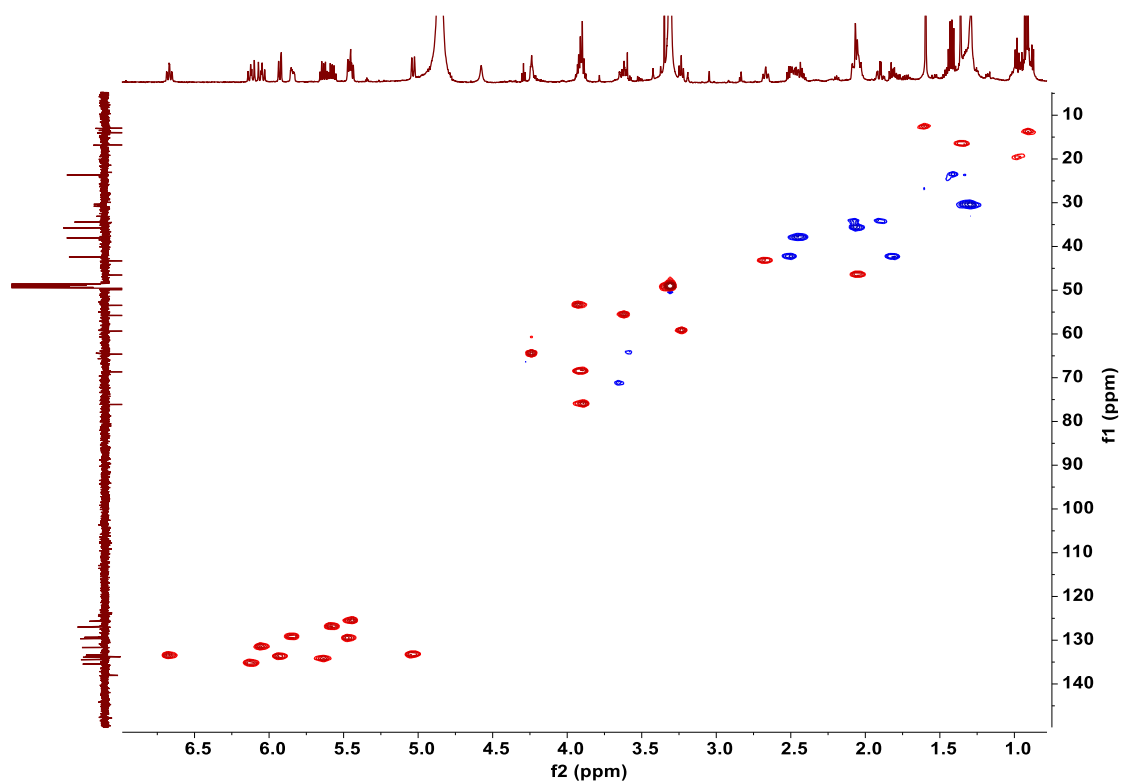

Figure S24. HSQC spectrum of **3** in CD<sub>3</sub>OD (600 MHz)

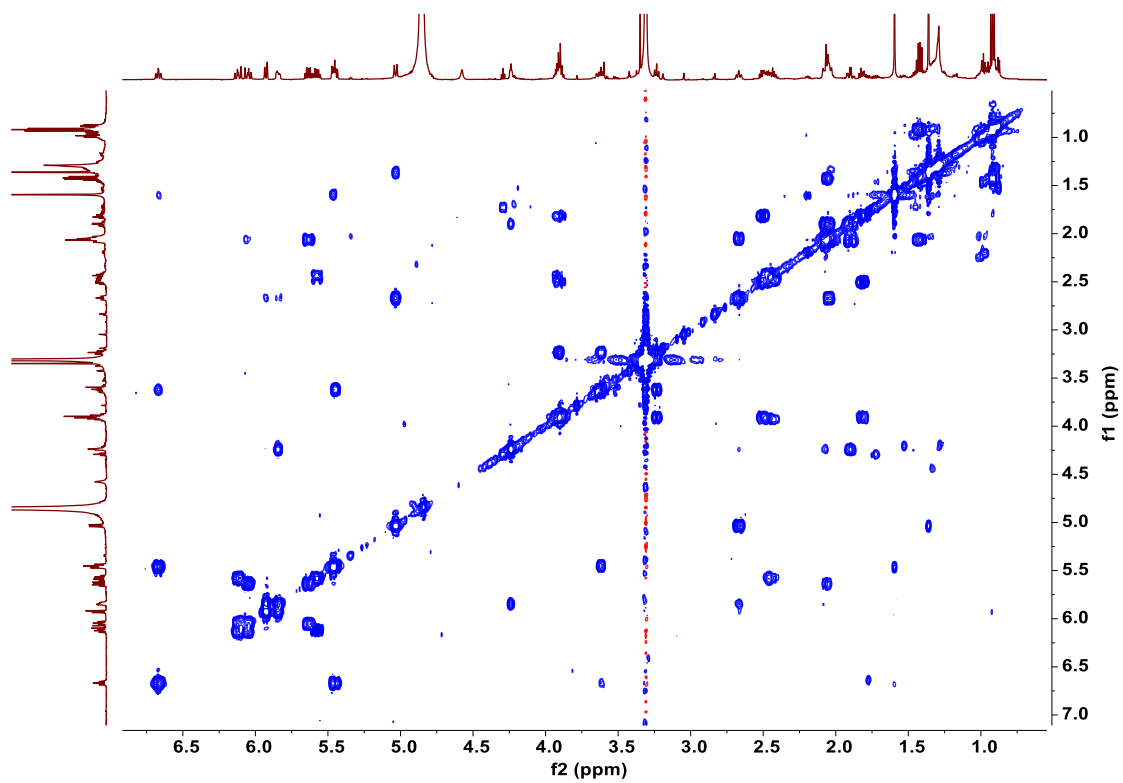

Figure S25. COSY spectrum of **3** in CD<sub>3</sub>OD (600 MHz)

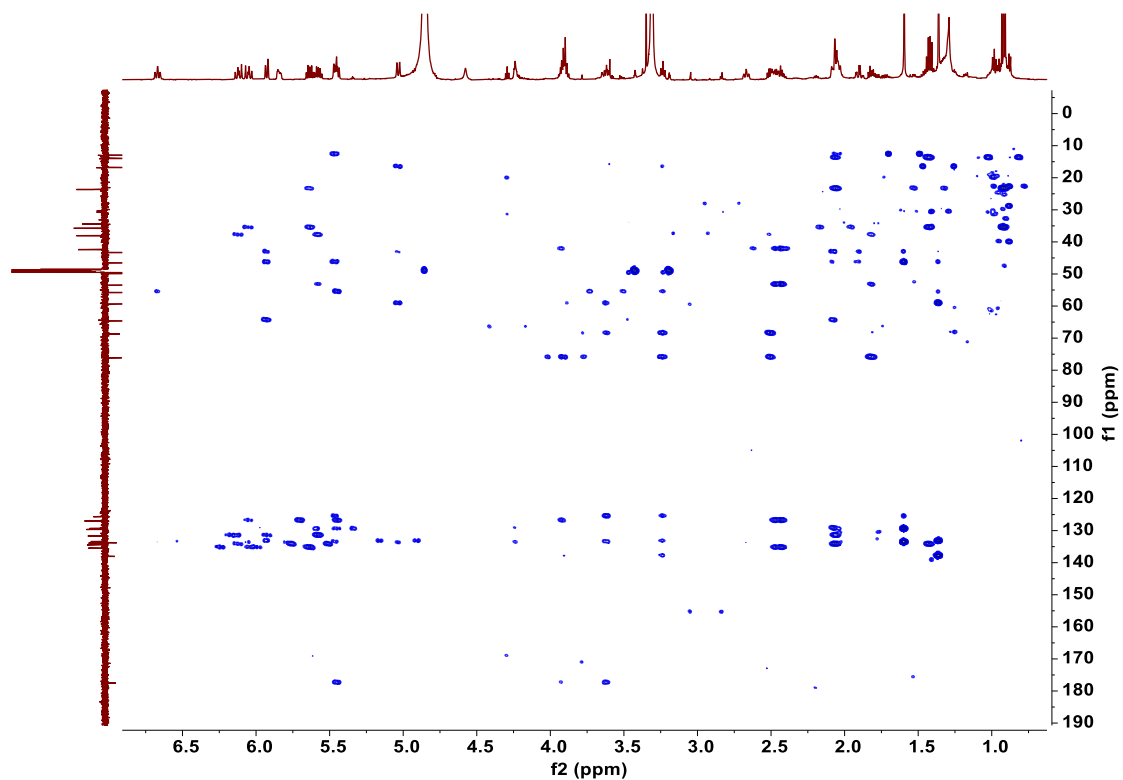

Figure S26. HMBC spectrum of **3** in CD<sub>3</sub>OD (600 MHz)

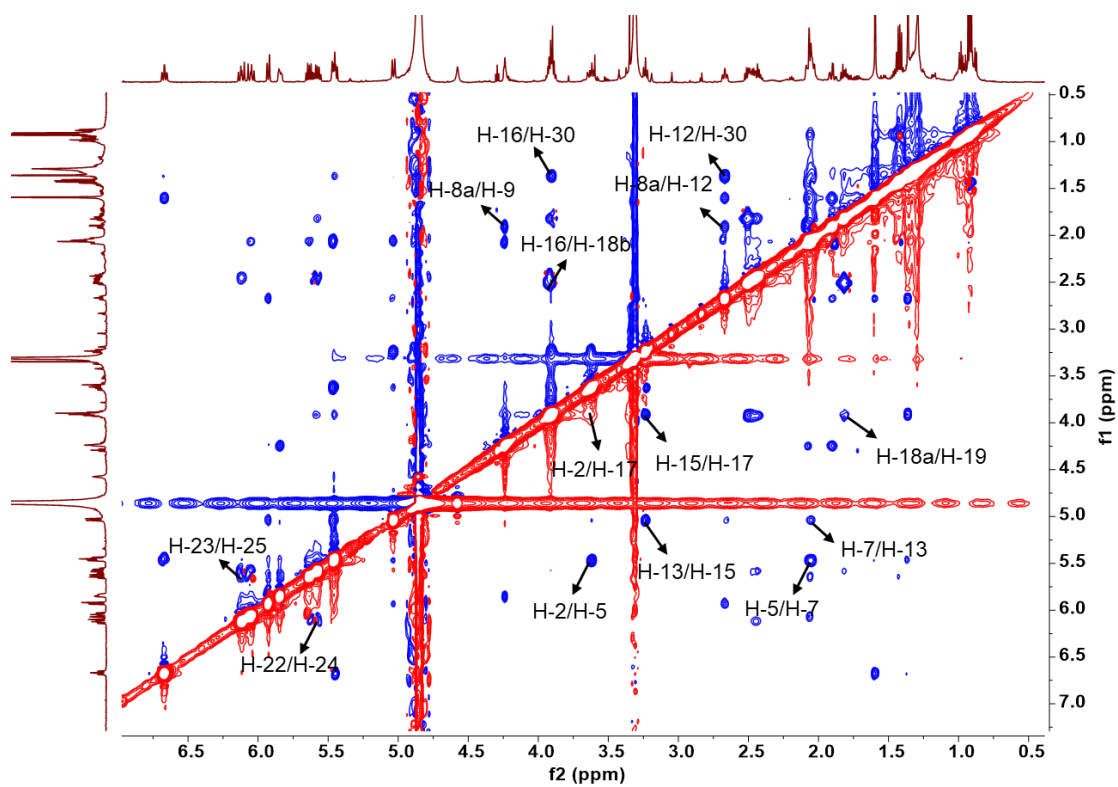

Figure S27. NOESY spectrum of **3** in CD<sub>3</sub>OD (600 MHz)

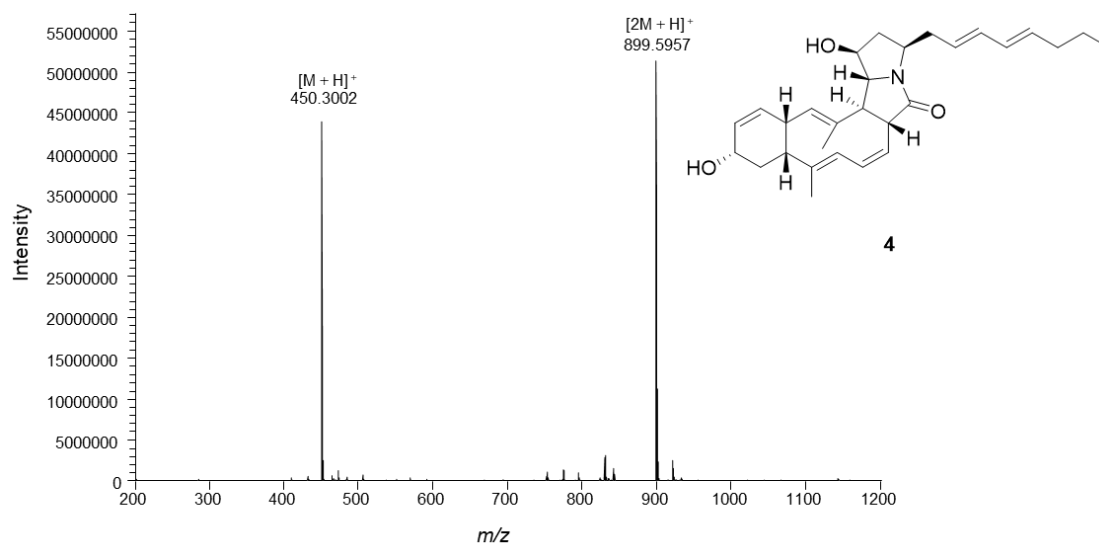

**Figure S28.** HRESIMS spectrum of **4**

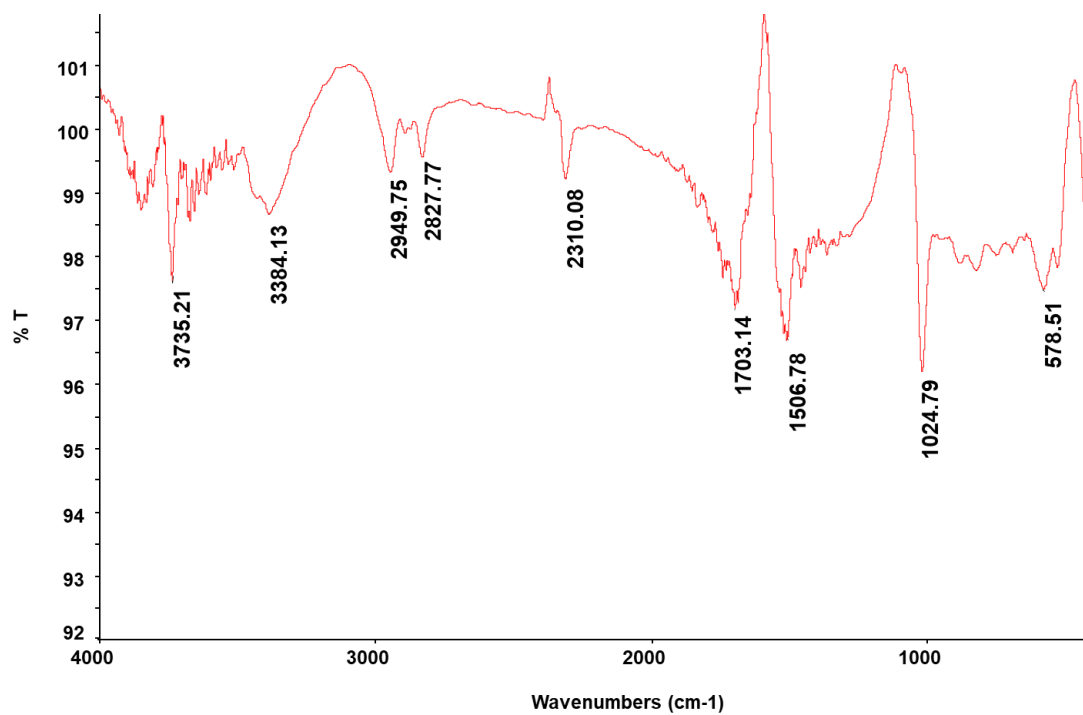

**Figure S29.** IR spectrum of **4**

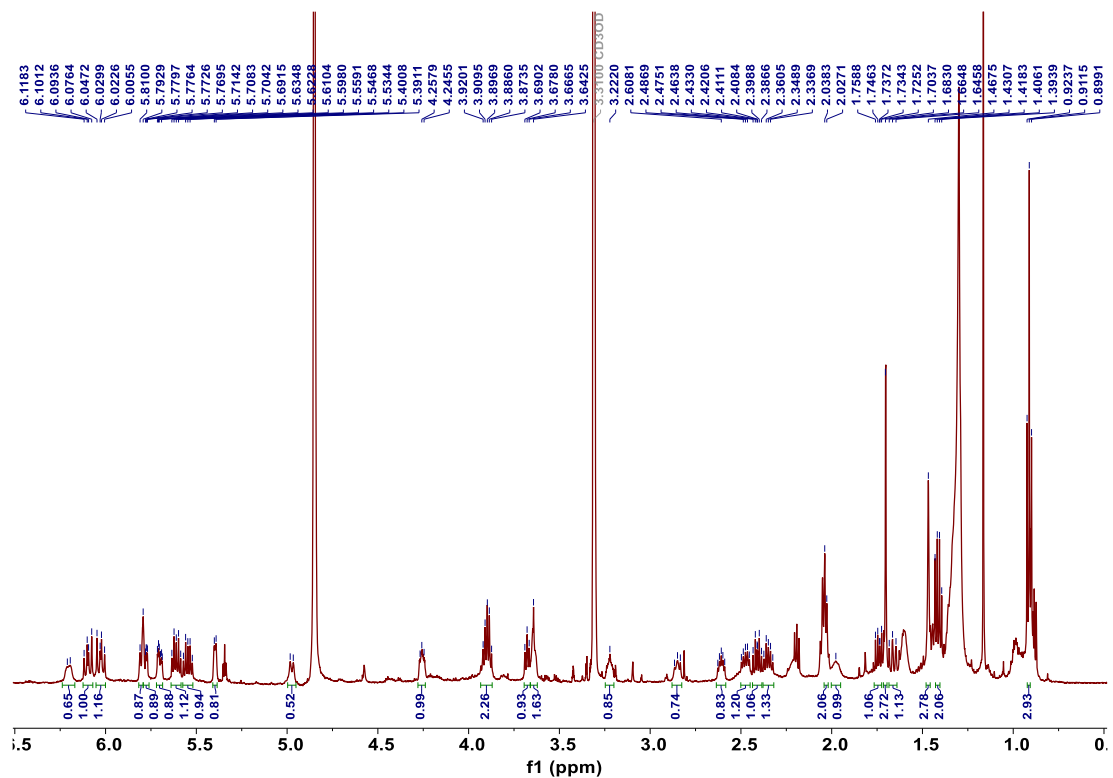

Figure S30.  $^1\text{H}$  NMR spectrum of **4** in  $\text{CD}_3\text{OD}$  (600 MHz)

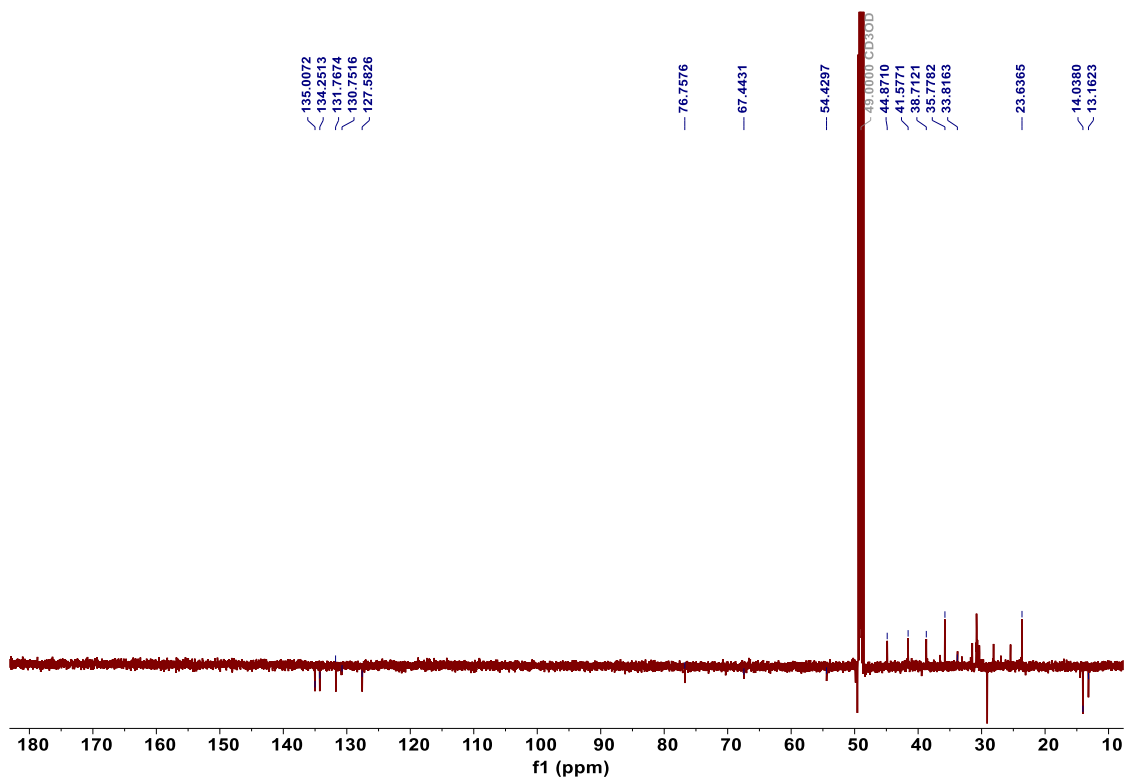

Figure S31. DEPTQ spectrum of **4** in  $\text{CD}_3\text{OD}$  (150 MHz)

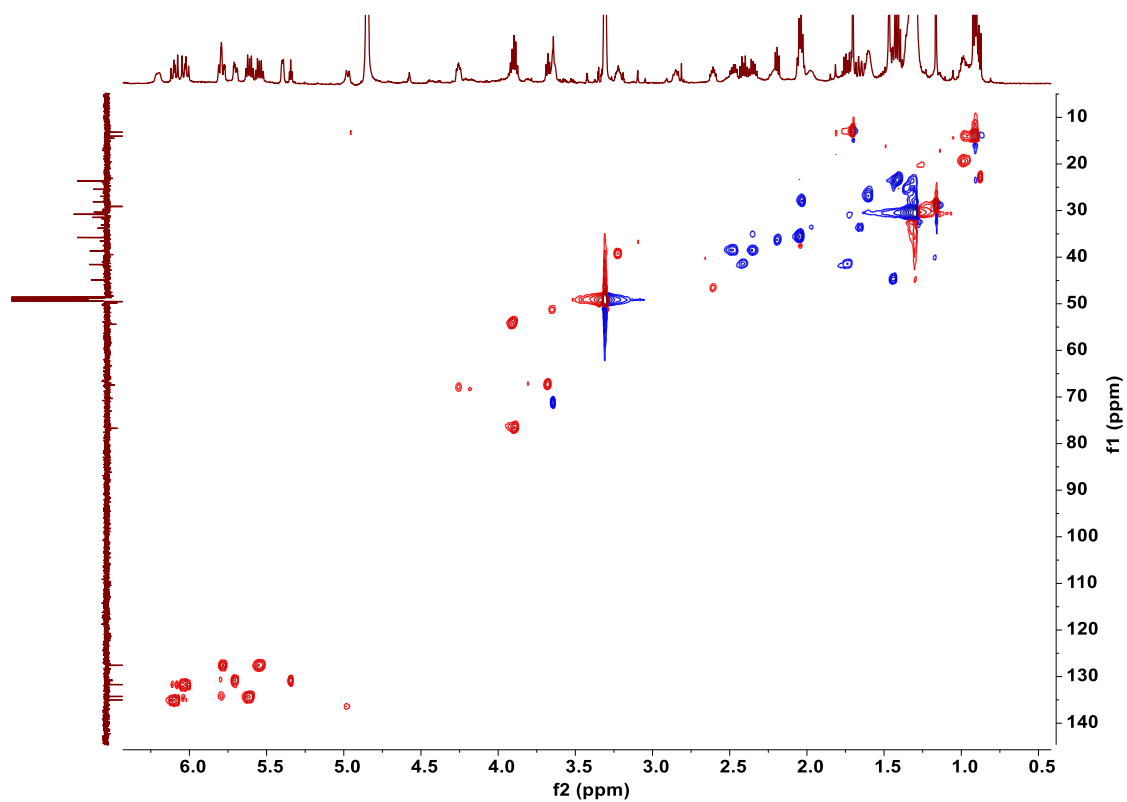

**Figure S32.** HSQC spectrum of **4** in CD<sub>3</sub>OD (600 MHz)

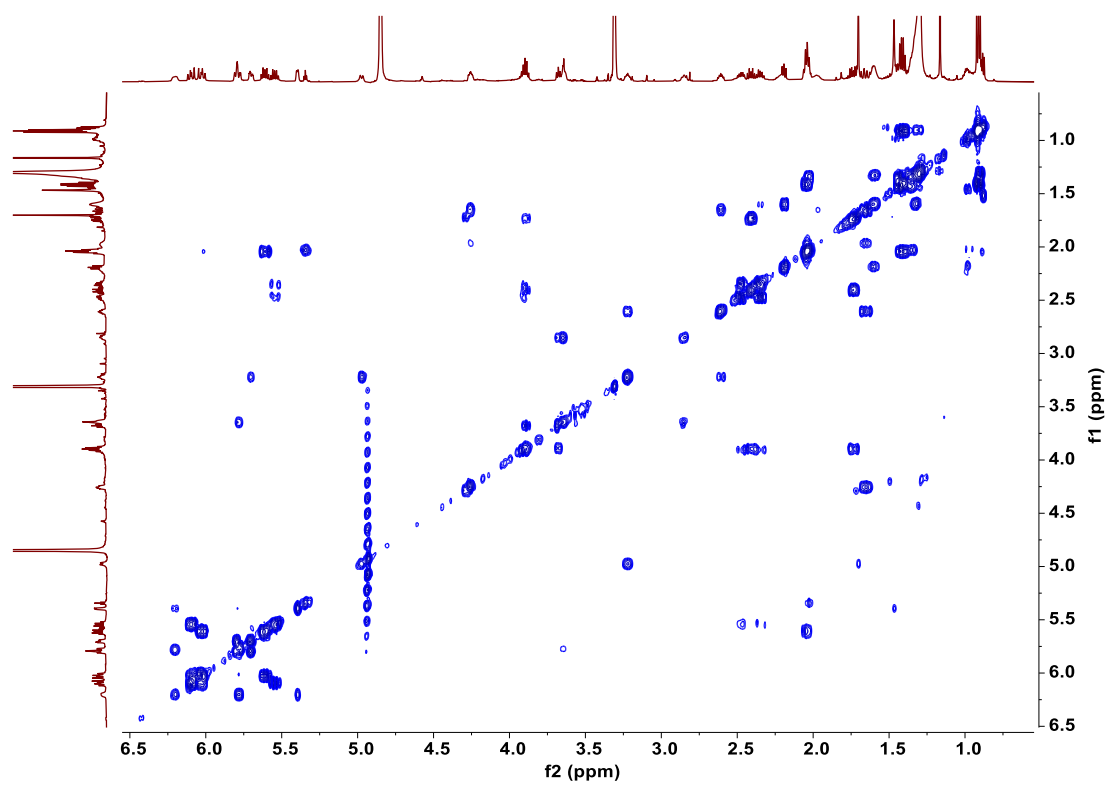

**Figure S33.** COSY spectrum of **4** in CD<sub>3</sub>OD (600 MHz)

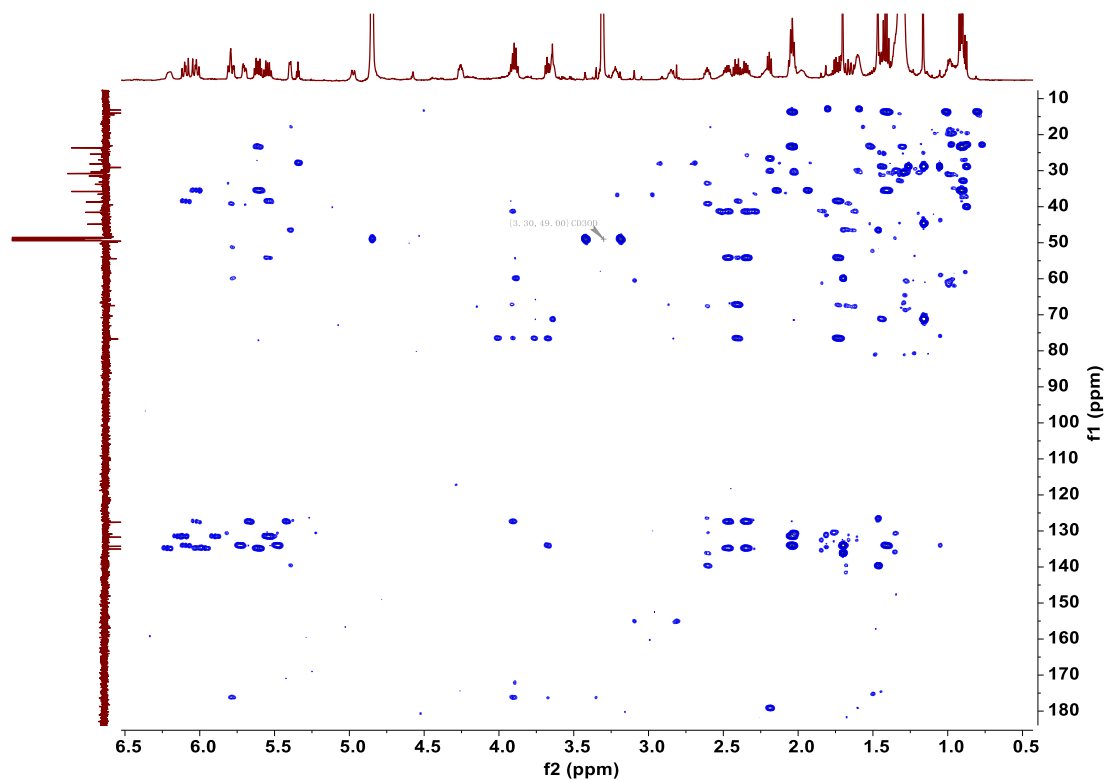

Figure S34. HMBC spectrum of **4** in CD<sub>3</sub>OD (600 MHz)

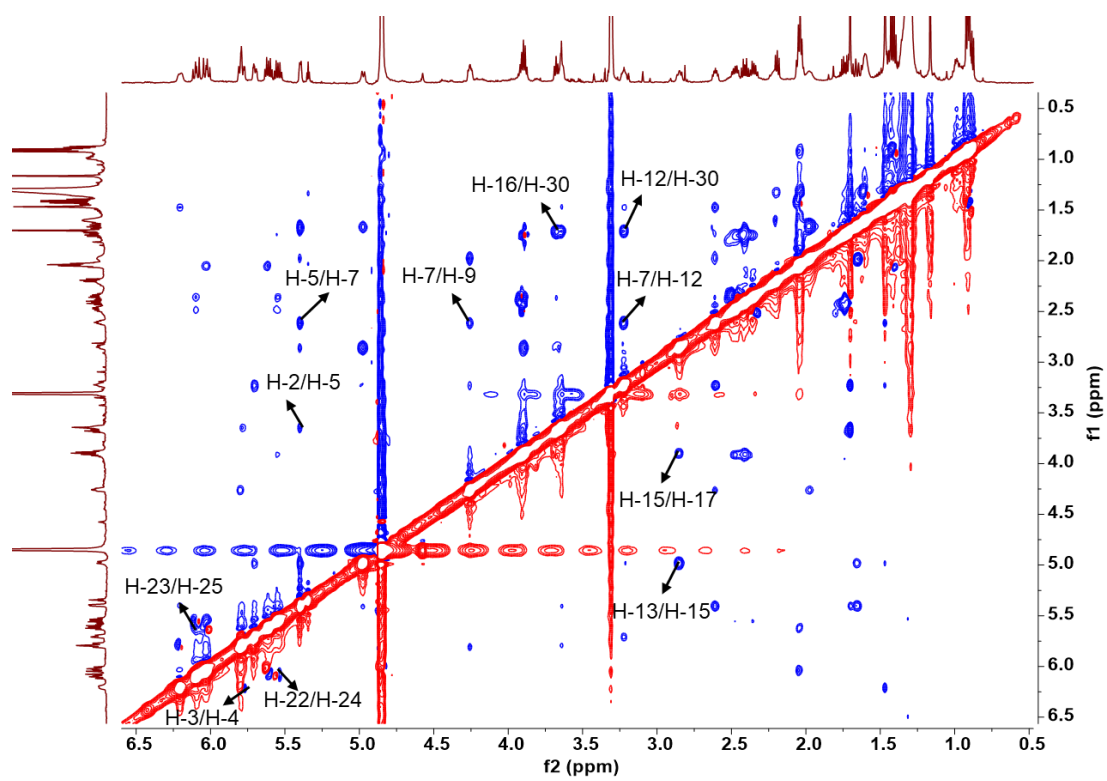

Figure S35. NOESY spectrum of **4** in CD<sub>3</sub>OD (600 MHz)

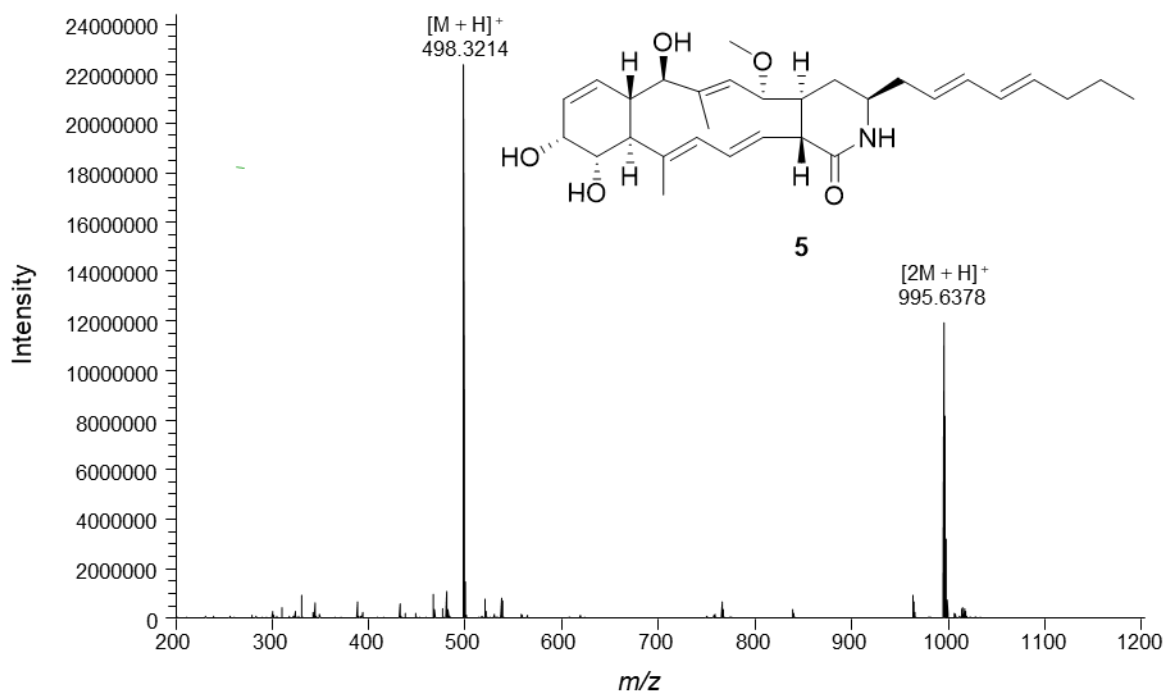

Figure S36. HRESIMS spectrum of 5

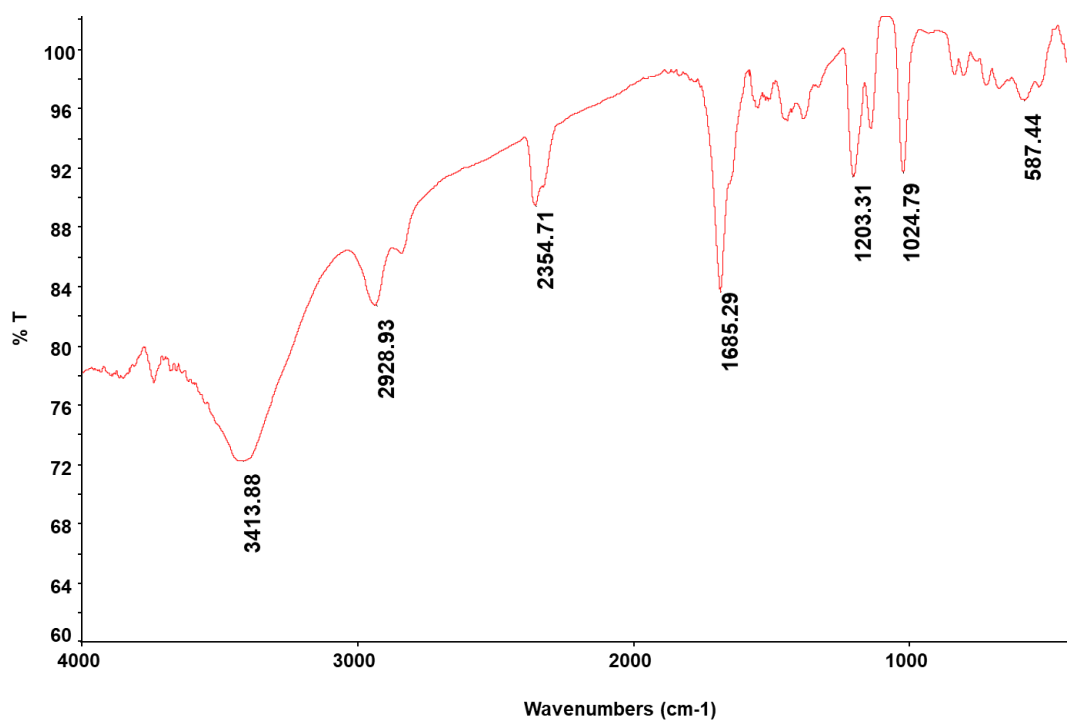

Figure S37. IR spectrum of 5

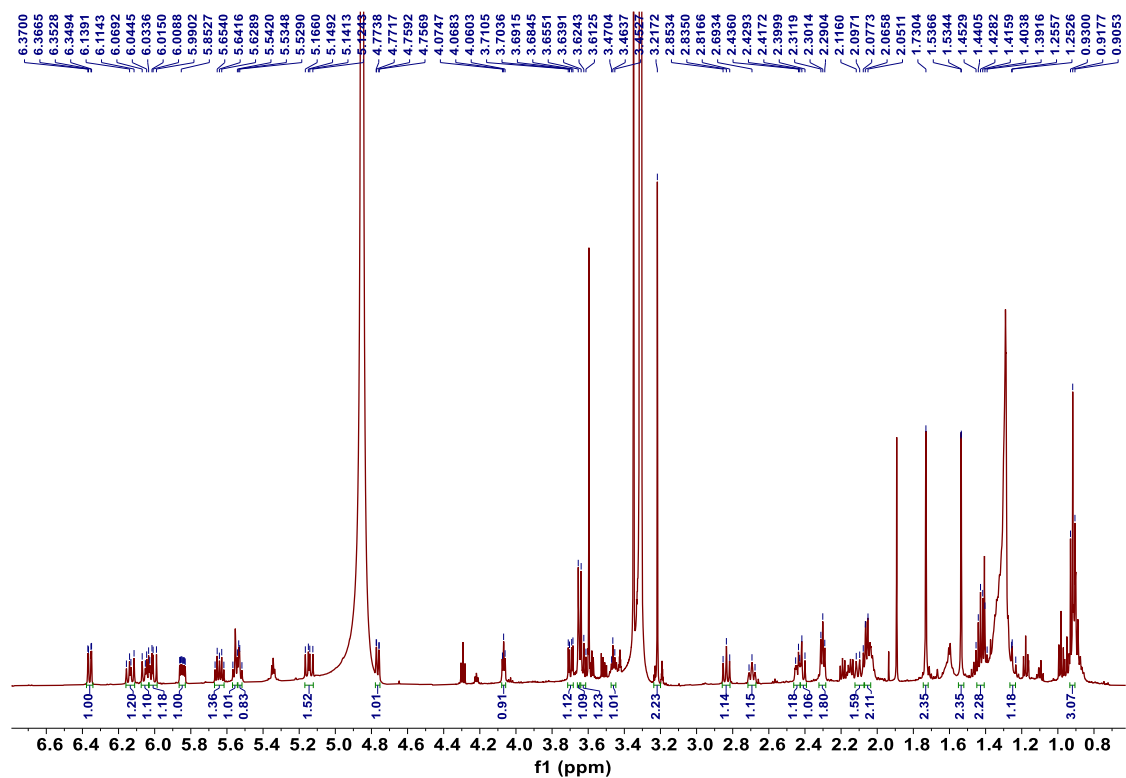

Figure S38.  $^1\text{H}$  NMR spectrum of **5** in  $\text{CD}_3\text{OD}$  (600 MHz)

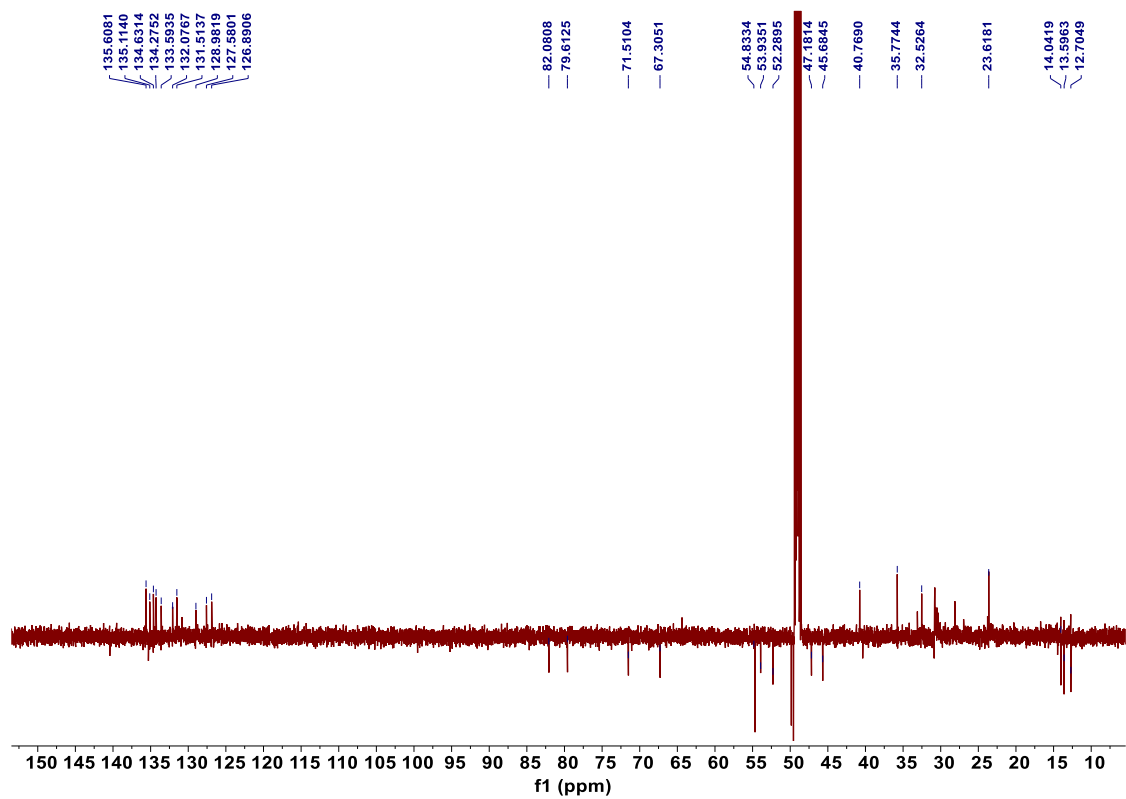

Figure S39. DEPTQ spectrum of **5** in  $\text{CD}_3\text{OD}$  (150 MHz)



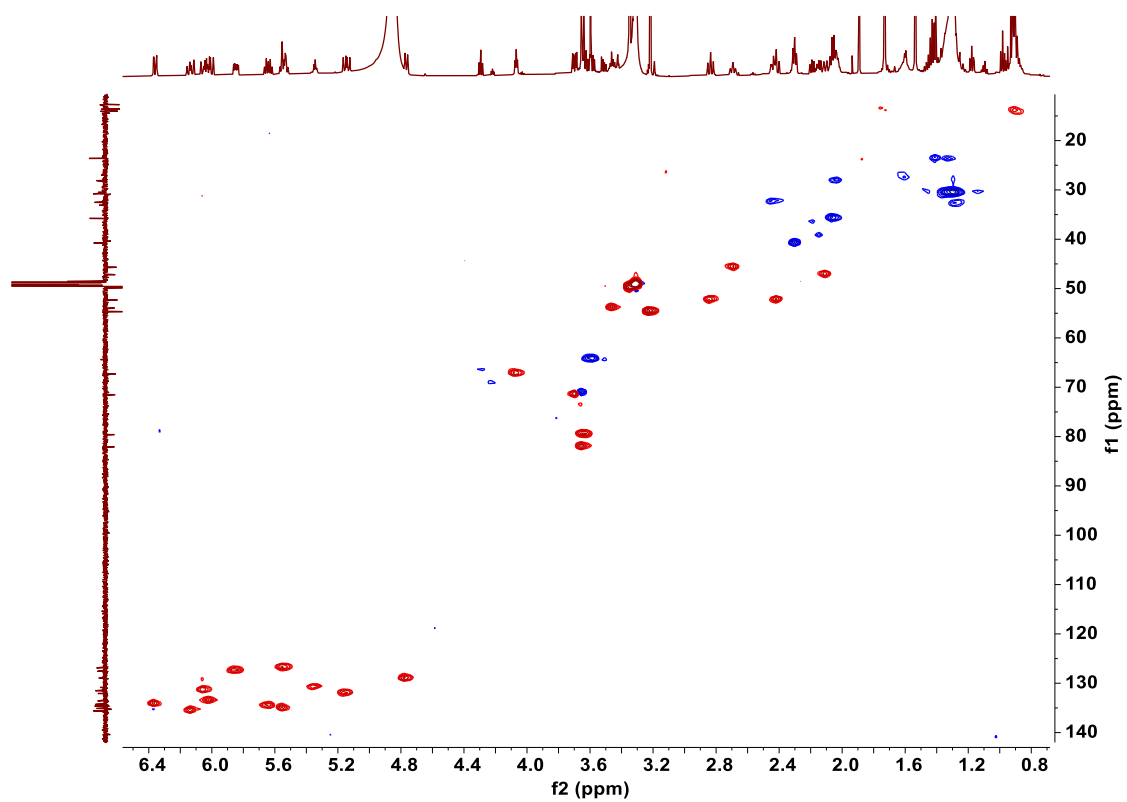

Figure S40. HSQC spectrum of **5** in CD<sub>3</sub>OD (600 MHz)

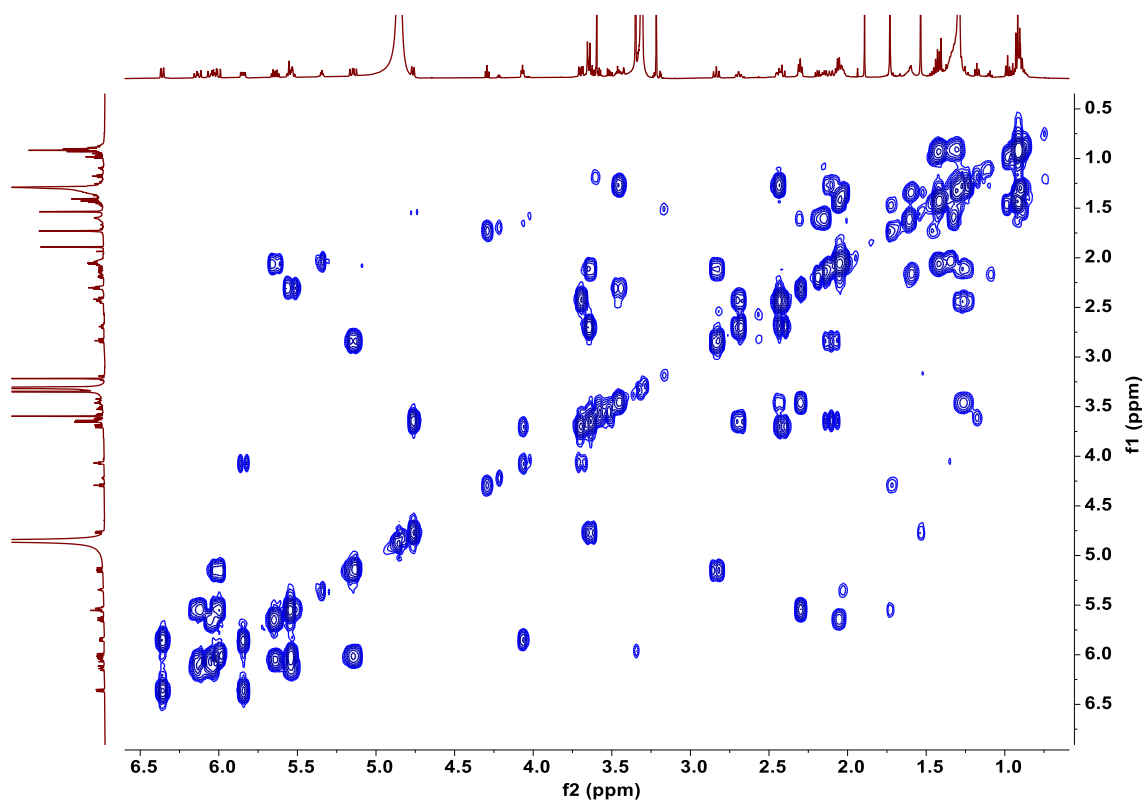

Figure S41. COSY spectrum of **5** in CD<sub>3</sub>OD (600 MHz)

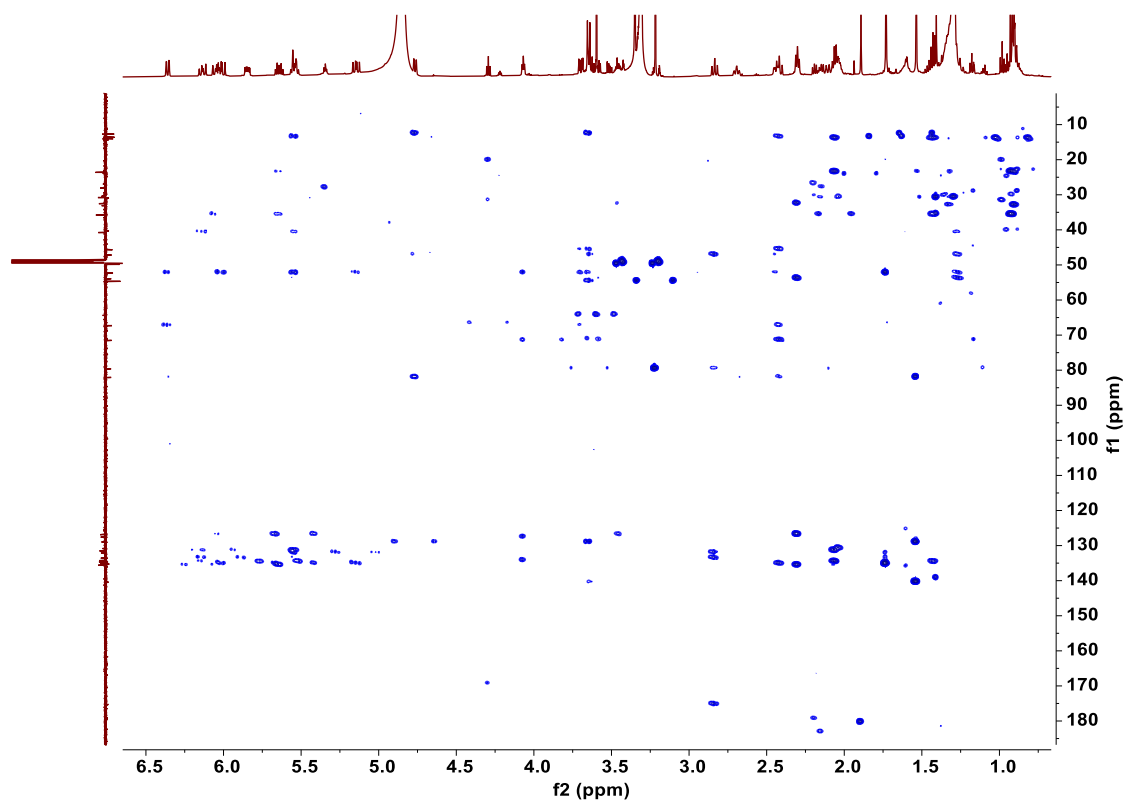

Figure S42. HMBC spectrum of **5** in CD<sub>3</sub>OD (600 MHz)

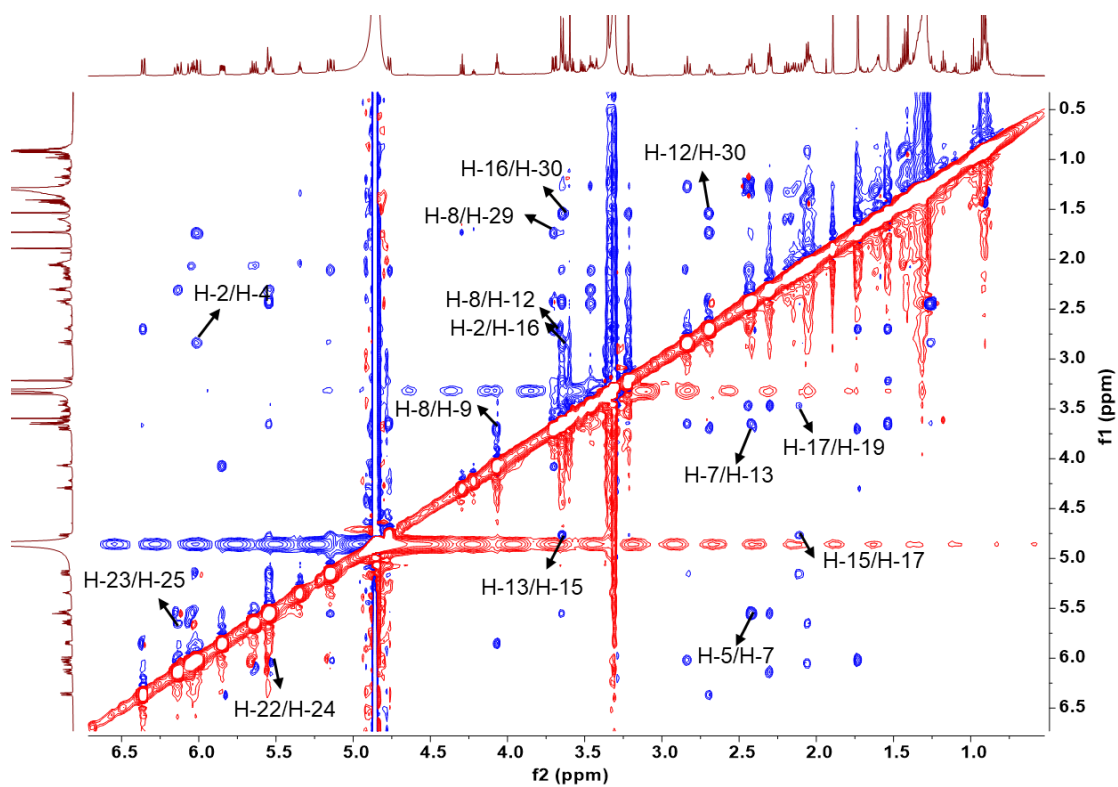

Figure S43. NOESY spectrum of **5** in CD<sub>3</sub>OD (600 MHz)

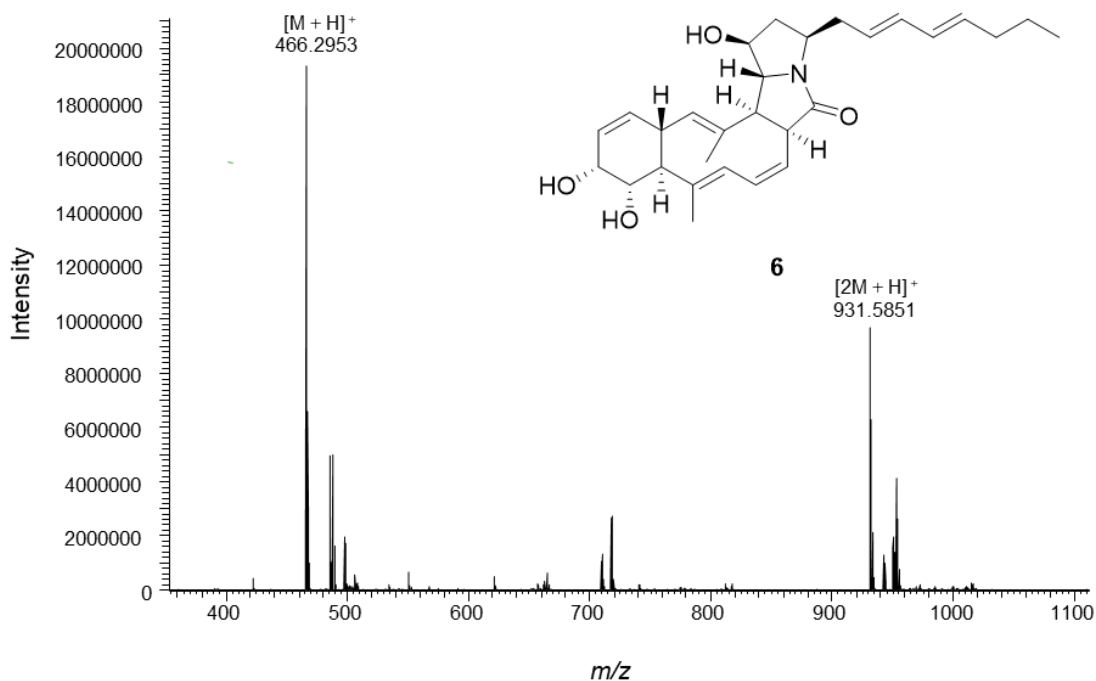

Figure S44. HRESIMS spectrum of **6**

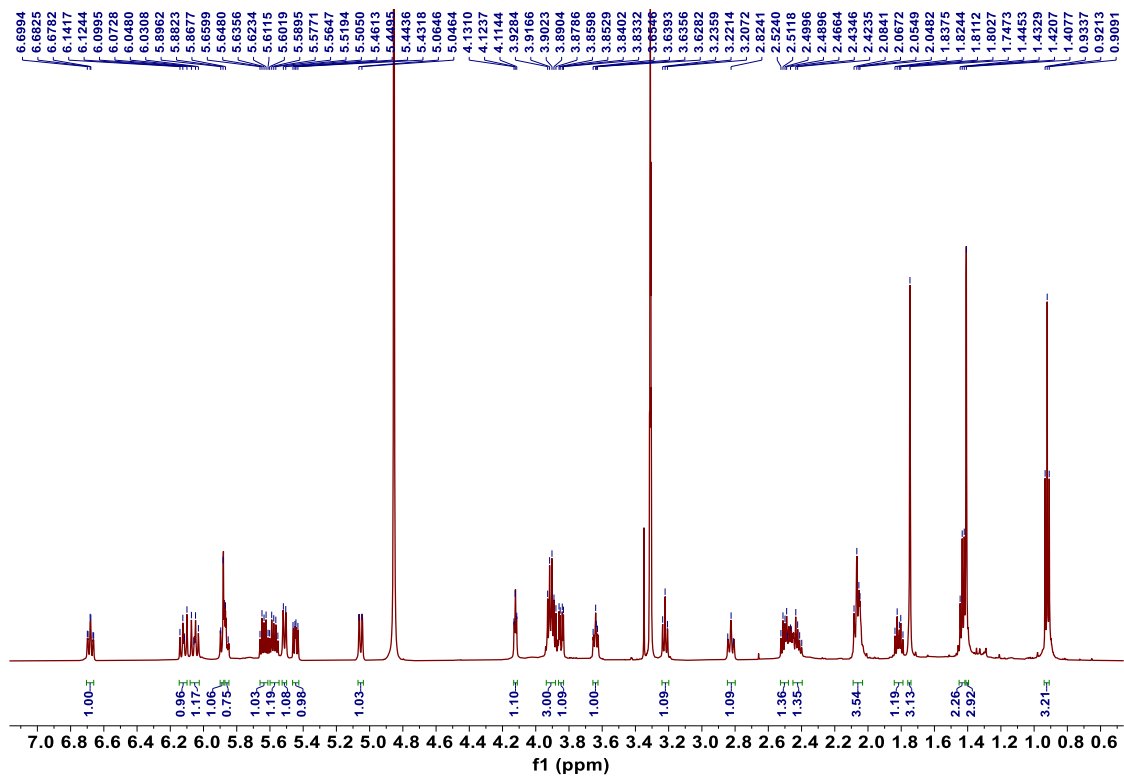

Figure S45.  $^1\text{H}$  NMR spectrum of **6** in  $\text{CD}_3\text{OD}$  (600 MHz)

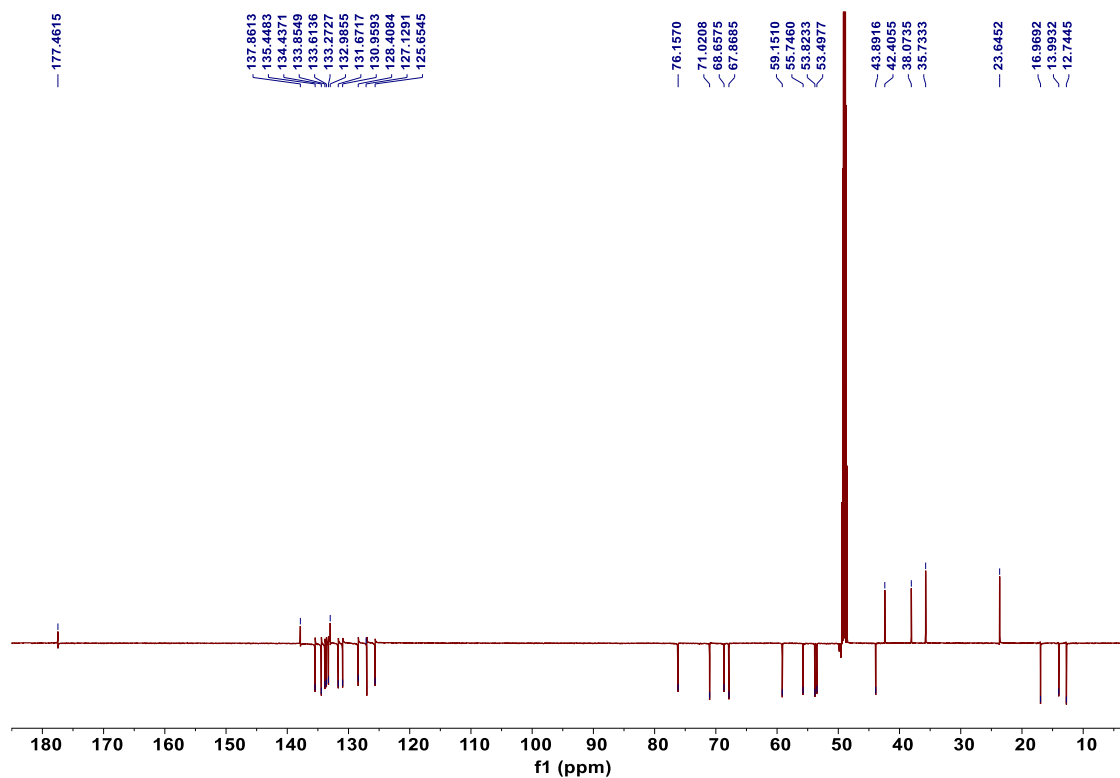

Figure S46. DEPTQ spectrum of **6** in CD<sub>3</sub>OD (150 MHz)

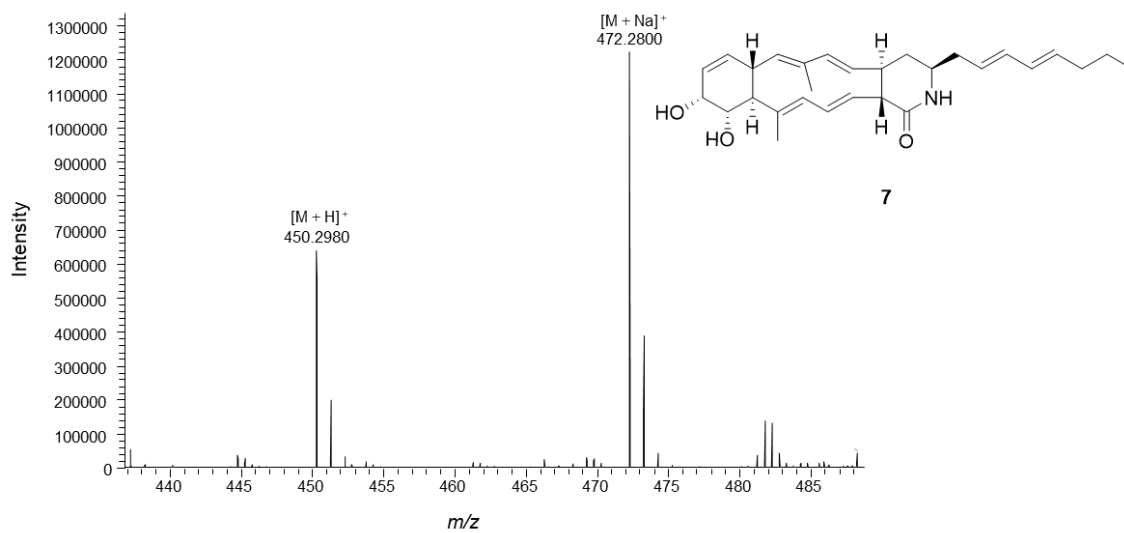

Figure S47. HRESIMS spectrum of **7**

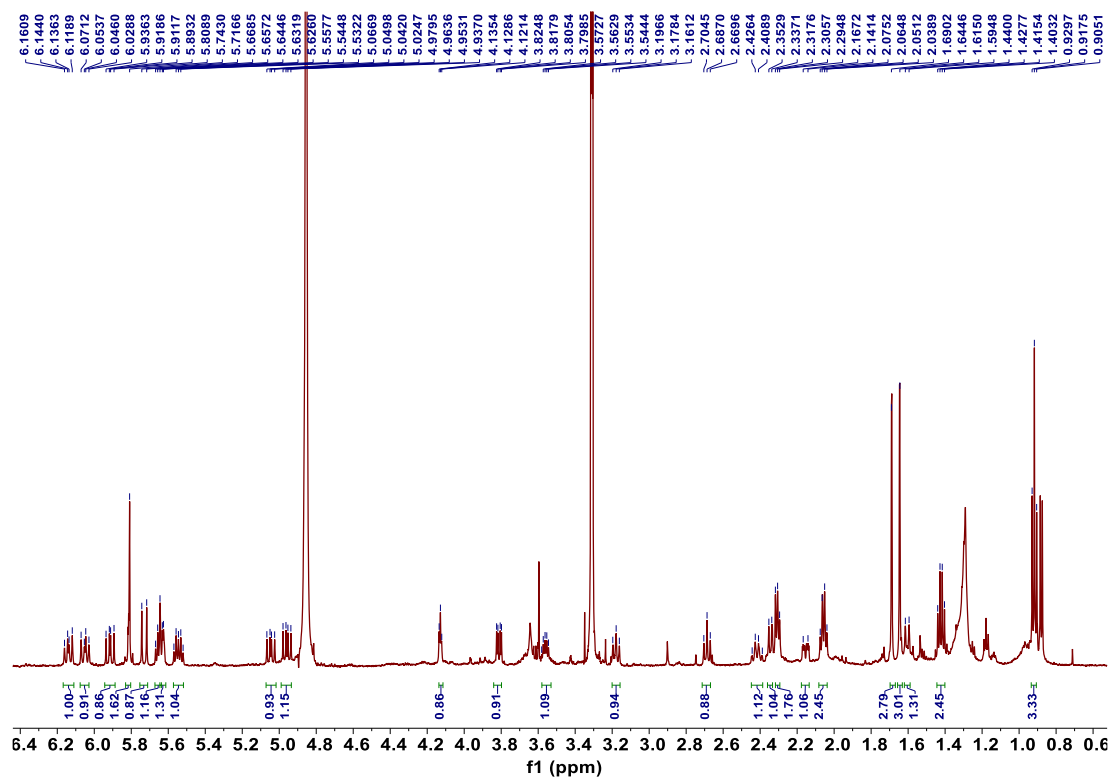

Figure S48.  $^1\text{H}$  NMR spectrum of **7** in  $\text{CD}_3\text{OD}$  (600 MHz)

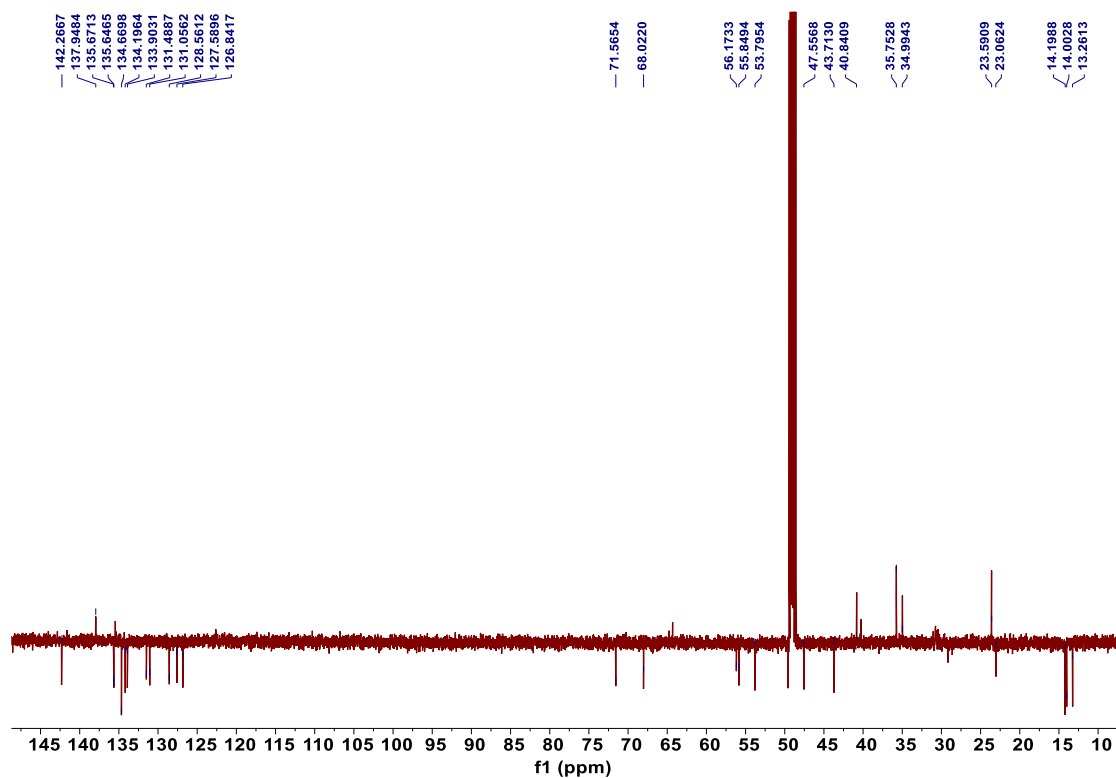

Figure S49. DEPTQ spectrum of **7** in  $\text{CD}_3\text{OD}$  (150 MHz)

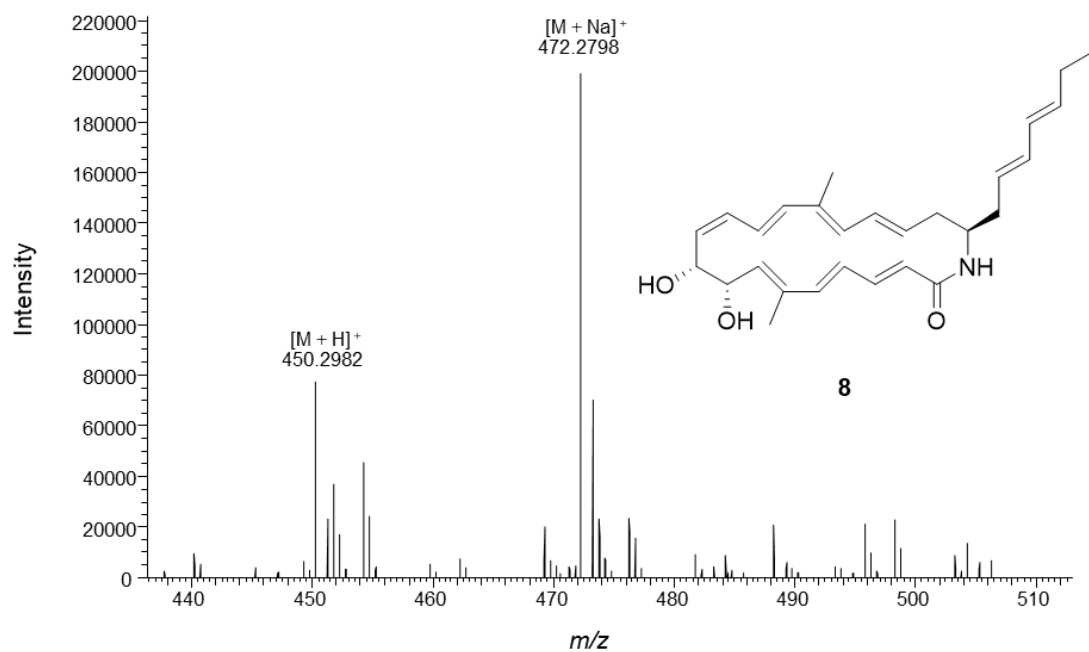

Figure S50. HRESIMS spectrum of **8**

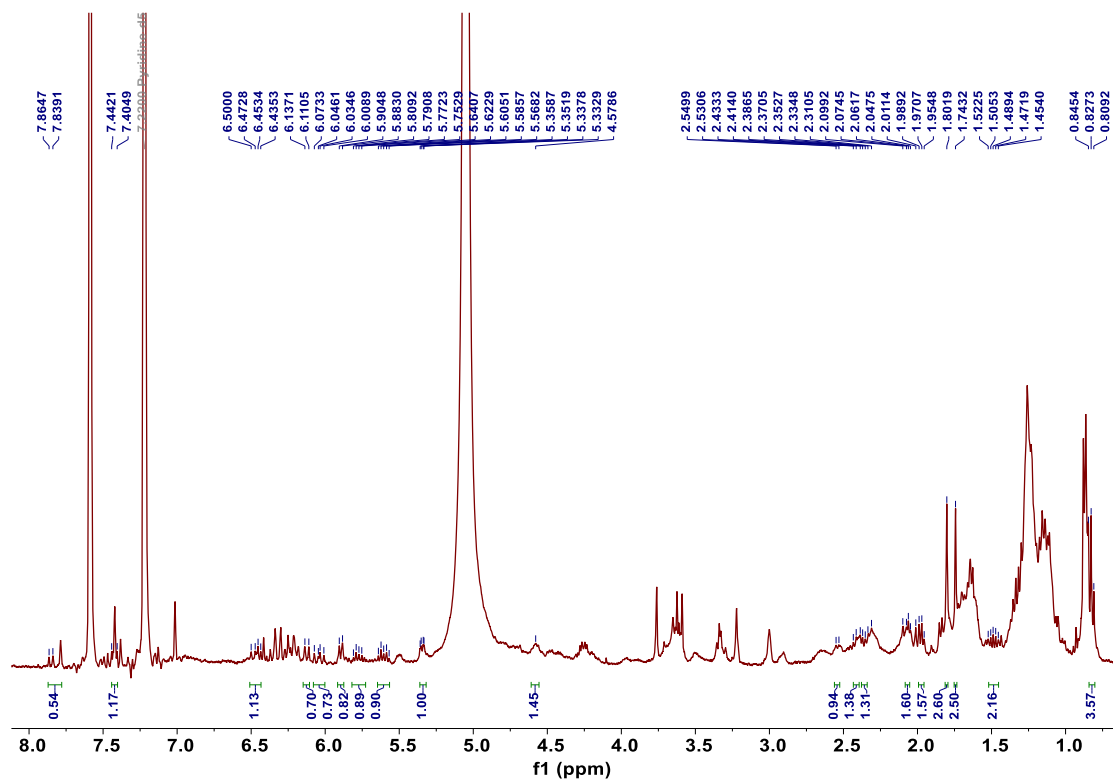

Figure S51.  $^1\text{H}$  NMR spectrum of **8** in pyridine- $d_5$  (500 MHz)

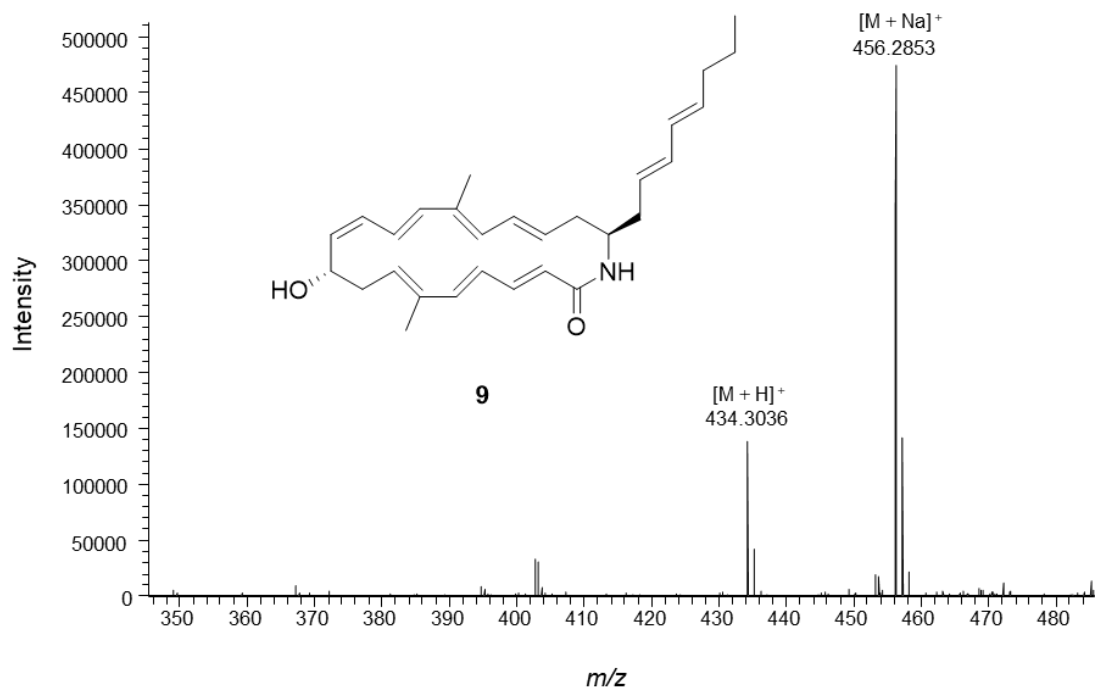

Figure S52. HRESIMS spectrum of **9**

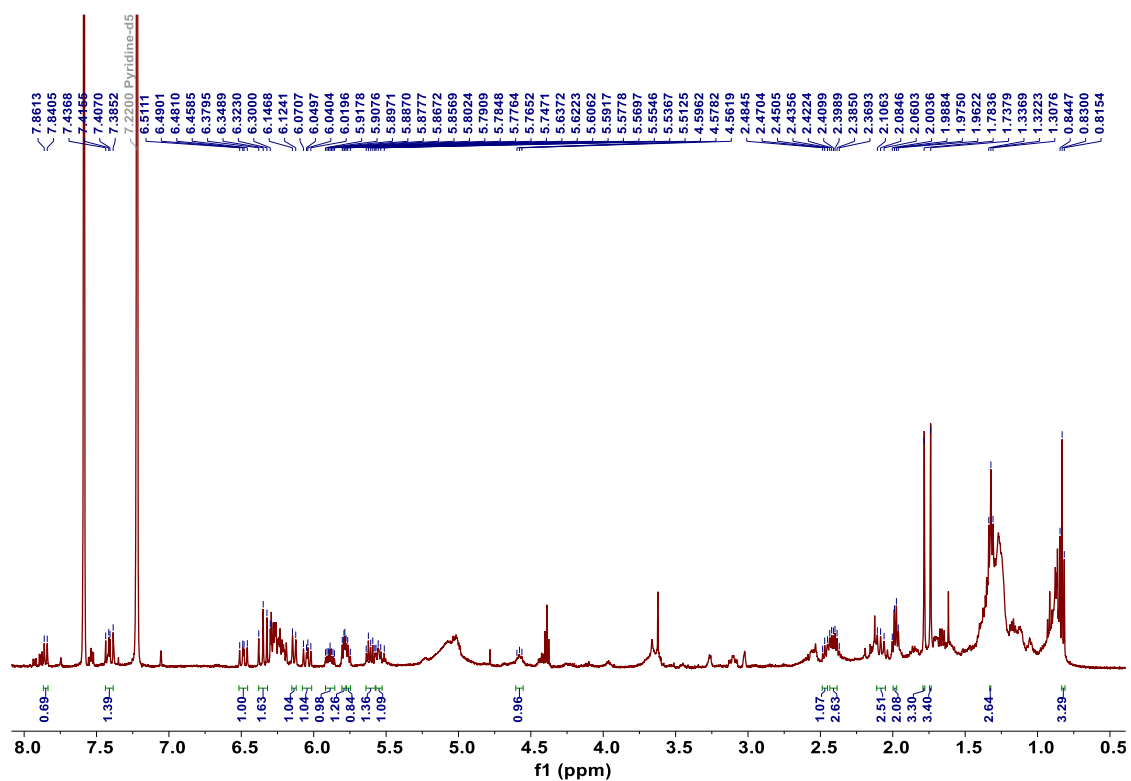

Figure S53. <sup>1</sup>H NMR spectrum of **9** in pyridine-*d*<sub>5</sub> (500 MHz)

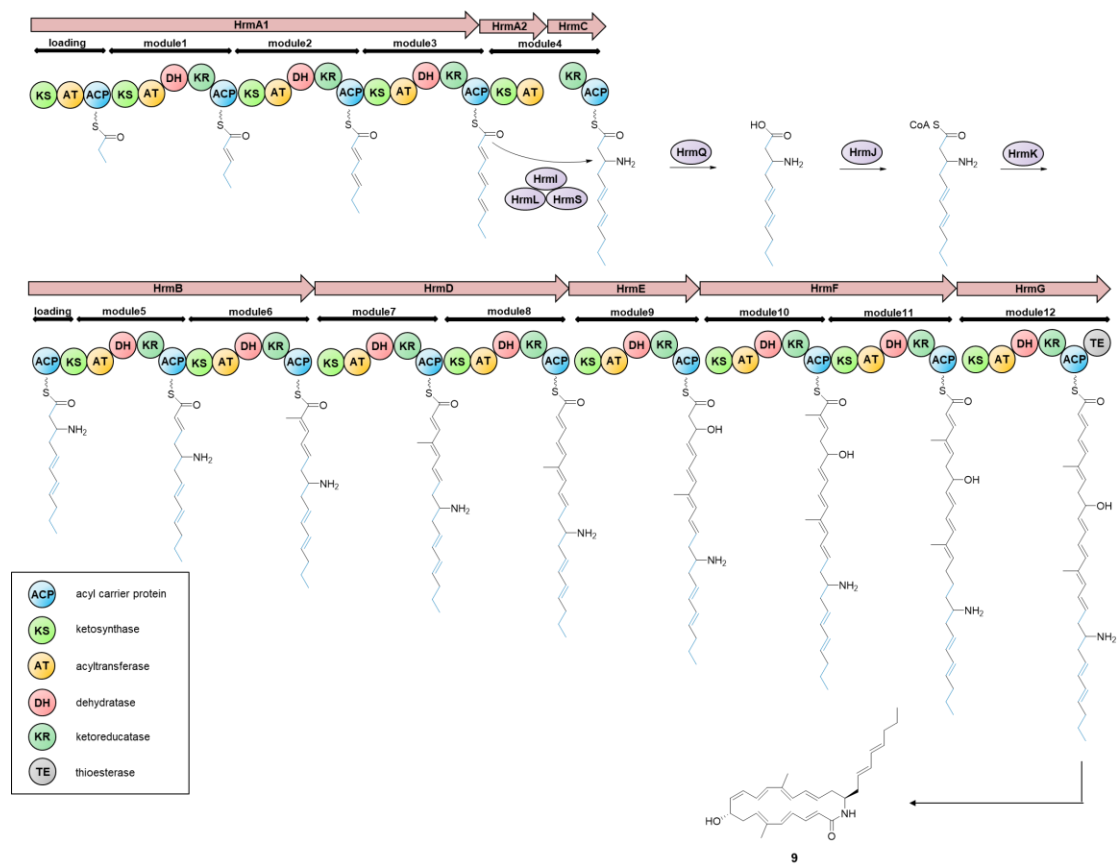

**Figure S54.** Proposed biosynthetic pathway of compound **9** by *hrm* gene cluster (GenBank Accession No. OR972664) in *Streptomyces* sp. OUCT16-38.



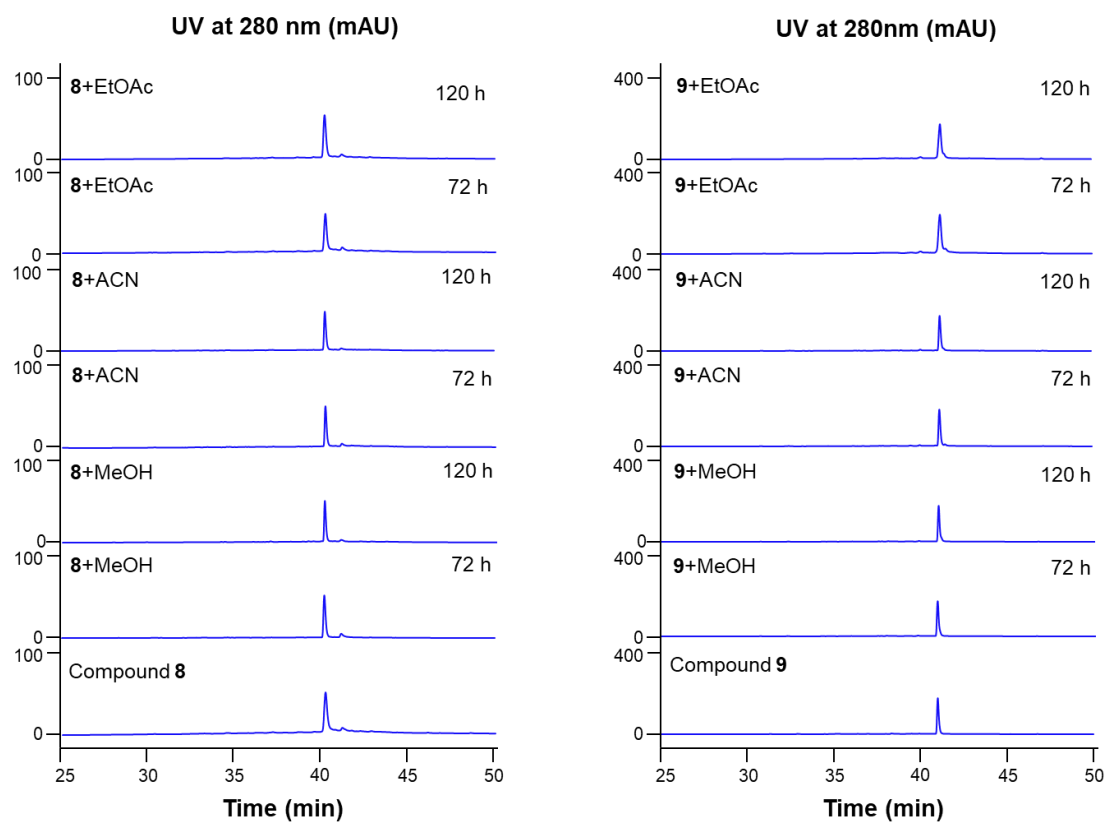

**Figure S55.** HPLC trace of compounds **8** and **9** retained in MeOH, ACN and EtOAc at room temperature for up to 120 h. The HPLC analysis was performed under gradient conditions (10-100% MeOH) using Agilent Proshell 120 SB-C18 (3 ×150 mm, 2.7 μm) at a flowrate of 0.3 mL/min.

**Table S1.** Antibacterial activity of the EtOAc extract of the OUCT16-38 strain

| Sample        | Inhibition zone (mm)           |                                 |                                  |
|---------------|--------------------------------|---------------------------------|----------------------------------|
|               | <i>S. aureus</i><br>CCARM 3090 | <i>E. faecium</i><br>CCARM 8250 | <i>E. faecalis</i><br>CCARM 5172 |
| EtOAc extract | 16                             | 18                              | 18                               |
| tetracycline  | 12                             | 32                              | 7                                |

**Table S2.** Functional prediction of proteins encoded by genes in *hrm* gene cluster and their homologs in known heronamide BGCs (*hrn*, *mIa*, *her* and *bec*).

| Protein | Size <sup>a</sup> | Proposed function          | Homologs | SI/ID <sup>b</sup> | Accession number |
|---------|-------------------|----------------------------|----------|--------------------|------------------|
| HrmA1   | 6359              | Polyketide synthase type I | HrnA1    | 99/75              | SAI82895.1       |
|         |                   |                            | MlaA1    | 100/75             | ACO94483.1       |
|         |                   |                            | HerA1    | 100/66             | AKD43768.1       |
|         |                   |                            | BecA     | 98/74              | ACO94456.1       |
| HrmA2   | 1036              | Polyketide synthase type I | HrnA2    | 100/81             | SAI82896.1       |
|         |                   |                            | MlaA2    | 99/81              | ACO94484.1       |
|         |                   |                            | HerA2    | 99/77              | AKD43769.1       |
|         |                   |                            | BecA     | 99/74              | ACO94456.1       |
| HrmB    | 3537              | Polyketide synthase type I | HrnB     | 100/83             | SAI82900.1       |
|         |                   |                            | MlaB     | 100/83             | ACO94488.1       |
|         |                   |                            | HerB     | 100/80             | AKD43753.1       |
|         |                   |                            | BecB     | 100/83             | ACO94460.1       |
| HrmC    | 697               | Polyketide synthase type I | HrnC     | 100/77             | SAI82898.1       |
|         |                   |                            | MlaC     | 100/77             | ACO94486.1       |
|         |                   |                            | HerC     | 100/78             | AKD43751.1       |
|         |                   |                            | BecC     | 100/75             | ACO94458.1       |
| HrmD    | 3372              | Polyketide synthase type I | HrnD     | 100/81             | SAI82908.1       |
|         |                   |                            | MlaD     | 100/81             | ACO94496.1       |
|         |                   |                            | HerD     | 99/78              | AKD43761.1       |
|         |                   |                            | BecD     | 99/81              | ACO94468.1       |
| HrmE    | 1642              | Polyketide synthase type I | HrnE     | 100/76             | SAI82912.1       |
|         |                   |                            | MlaE     | 100/76             | ACO94500.1       |
|         |                   |                            | HerE     | 99/75              | AKD43765.1       |
|         |                   |                            | BecE     | 100/77             | ACO94472.1       |
| HrmF    | 3390              | Polyketide synthase type I | HrnF     | 99/79              | SAI82911.1       |
|         |                   |                            | MlaF     | 99/80              | ACO94499.1       |
|         |                   |                            | HerF     | 99/77              | AKD43764.1       |
|         |                   |                            | BecF     | 99/80              | ACO94471.1       |

|      |      |                                              |      |        |            |
|------|------|----------------------------------------------|------|--------|------------|
| HrmG | 1983 | Polyketide synthase type I                   | HrnG | 100/78 | SAI82910.1 |
|      |      |                                              | MlaG | 100/79 | ACO94498.1 |
|      |      |                                              | HerG | 100/76 | AKD43763.1 |
|      |      |                                              | BecG | 100/79 | ACO94470.1 |
| HrmH | 902  | LuxR-type transcriptional regulator          | HrnH | 99/74  | SAI82894.1 |
|      |      |                                              | MlaH | 99/74  | ACO94482.1 |
|      |      |                                              | HerH | 99/68  | AKD43767.1 |
|      |      |                                              | BecH | 99/74  | ACO94455.1 |
| HrmI | 365  | Glycine oxidase/FAD-dependent oxidoreductase | HrnI | 98/77  | SAI82897.1 |
|      |      |                                              | MlaI | 98/78  | ACO94485.1 |
|      |      |                                              | HerI | 98/77  | AKD43750.1 |
|      |      |                                              | BecI | 98/77  | ACO94457.1 |
| HrmJ | 532  | AMP-dependent acyl-CoA synthetase/ligase     | HrnJ | 98/86  | SAI82901.1 |
|      |      |                                              | MlaJ | 100/86 | ACO94489.1 |
|      |      |                                              | HerJ | 100/81 | AKD43754.1 |
|      |      |                                              | BecJ | 100/84 | ACO94461.1 |
| HrmK | 313  | Acyltransferase                              | HrnK | 100/79 | SAI82902.1 |
|      |      |                                              | MlaK | 100/80 | ACO94490.1 |
|      |      |                                              | HerK | 100/82 | AKD43755.1 |
|      |      |                                              | BecK | 100/77 | ACO94462.1 |
| HrmL | 505  | NRPS adenylation domain                      | HrnL | 97/83  | SAI82904.1 |
|      |      |                                              | MlaL | 97/84  | ACO94492.1 |
|      |      |                                              | HerL | 99/83  | AKD43757.1 |
|      |      |                                              | BecL | 100/81 | ACO94464.1 |
| HrmM | 198  | TetR-type transcriptional regulator          | HrnM | 100/79 | SAI82905.1 |
|      |      |                                              | MlaM | 100/81 | ACO94493.1 |
|      |      |                                              | HerM | 100/80 | AKD43758.1 |
|      |      |                                              | BecM | 100/86 | ACO94465.1 |
| HrmN | 526  | MFS-type efflux pump                         | HrnN | 98/82  | SAI82906.1 |
|      |      |                                              | MlaN | 99/81  | ACO94494.1 |
|      |      |                                              | HerN | 99/78  | AKD43759.1 |
|      |      |                                              | BecN | 99/79  | ACO94466.1 |
| HrmO | 412  | P450 monooxygenase                           | HrnO | 100/79 | AKD43760.1 |
|      |      |                                              | MlaO | 100/80 | ACO94495.1 |
|      |      |                                              | HerO | 97/82  | AKD43760.1 |
|      |      |                                              | BecO | 100/80 | ACO94467.1 |

|      |     |                                                         |      |        |            |
|------|-----|---------------------------------------------------------|------|--------|------------|
| HrmP | 311 | Putative L-amino acid<br>amidase/proline iminopeptidase | HrnP | 100/86 | SAI82909.1 |
|      |     |                                                         | MlaP | 100/86 | ACO94497.1 |
|      |     |                                                         | HerP | 100/88 | AKD43762.1 |
|      |     |                                                         | BecP | 99/85  | ACO94469.1 |
| HrmQ | 195 | Thioesterase type II                                    | HrnQ |        | SAI82914.1 |
|      |     |                                                         | MlaQ |        | ACO94502.1 |
|      |     |                                                         | -    |        |            |
|      |     |                                                         | BecQ |        | ACO94474.1 |
| HrmS | 78  | Peptidyl carrier protein                                | HrnS | 100/82 | SAI82903.1 |
|      |     |                                                         | MlaS | 100/79 | ACO94491.1 |
|      |     |                                                         | HerS | 100/79 | AKD43756.1 |
|      |     |                                                         | BecS | 100/78 | ACO94463.1 |
| HrmT | 155 | SimX2-like protein                                      | HrnT |        | SAI82913.1 |
|      |     |                                                         | MlaT |        | ACO94501.1 |
|      |     |                                                         | -    |        |            |
|      |     |                                                         | BecT |        | ACO94473.1 |
| HrmU | 187 | Putative NRPS accessory<br>protein                      | HrnU | 98/85  | SAI82899.1 |
|      |     |                                                         | MlaU | 98/86  | ACO94487.1 |
|      |     |                                                         | HerU | 100/80 | AKD43752.1 |
|      |     |                                                         | BecU | 98/84  | ACO94459.1 |

<sup>a</sup>: amino acids; <sup>b</sup>: similarity/identity (%/%)

**Table S3.** Antibacterial Activity of **1–9** (MIC,  $\mu\text{g/mL}$ )

| Compound     | MIC ( $\mu\text{g/mL}$ )       |                                 |                                  |
|--------------|--------------------------------|---------------------------------|----------------------------------|
|              | <i>S. aureus</i> CCARM<br>3090 | <i>E. faecium</i> CCARM<br>5203 | <i>E. faecalis</i> CCARM<br>5172 |
| <b>1</b>     | >50                            | >50                             | >50                              |
| <b>2</b>     | >50                            | >50                             | >50                              |
| <b>3</b>     | >50                            | >50                             | >50                              |
| <b>4</b>     | >50                            | >50                             | >50                              |
| <b>5</b>     | >50                            | >50                             | >50                              |
| <b>6</b>     | >50                            | >50                             | >50                              |
| <b>7</b>     | >50                            | 50                              | >50                              |
| <b>8</b>     | 12.5                           | 3.1                             | 3.1                              |
| <b>9</b>     | >50                            | 3.1                             | 3.1                              |
| tetracycline | 6.2                            | 1.6                             | >50                              |

**Table S4.** Cytotoxicity of **8** and **9** ( $\text{IC}_{50}$ ,  $\mu\text{M}$ )

| Compound    | $\text{IC}_{50}$ ( $\mu\text{M}$ ) |               |                |                 |                |
|-------------|------------------------------------|---------------|----------------|-----------------|----------------|
|             | A549-Taxol                         | H1975         | H1299          | HEL             | LX-2           |
| <b>8</b>    | 4.4 $\pm$ 0.4                      | 3.1 $\pm$ 0.5 | 10.1 $\pm$ 1.1 | 4.4 $\pm$ 0.6   | 18.7 $\pm$ 1.8 |
| <b>9</b>    | 3.7 $\pm$ 0.2                      | 8.9 $\pm$ 0.5 | 7.6 $\pm$ 2.4  | 5.2 $\pm$ 0.1   | 39.4 $\pm$ 7.8 |
| doxorubicin | 1.6 $\pm$ 0.1                      | 0.1 $\pm$ 0.1 | 1.4 $\pm$ 0.1  | 0.05 $\pm$ 0.03 | 0.4 $\pm$ 0.1  |
